# Supplementary material
Source: PubMed Central journal article supplement (PMC3978386)
Supplement: NIHMS559751-supplement-BetaLactoneSI012014.pdf [file NIHMS559751-supplement-BetaLactoneSI012014.pdf]

# Supporting Information

## Remodeling Natural Products: Chemistry and Serine Hydrolase Activity of a Rocaglate-Derived $\beta$ -Lactone

Neil J. Lajkiewicz,<sup>†</sup> Armand B. Cognetta, III,<sup>‡</sup> Micah J. Niphakis,<sup>‡</sup> Benjamin F. Cravatt,<sup>\*,‡</sup> John A. Porco, Jr.<sup>\*,†</sup>

<sup>†</sup>Department of Chemistry, Center for Chemical Methodology and Library Development (CMLD-BU), Boston University, 590 Commonwealth Avenue Boston, MA 02215, United States

<sup>‡</sup>Department of Chemical Physiology, The Scripps Research Institute, 10550 North Torrey Pines Road, La Jolla, California 92037, United States

e-mail: porco@bu.edu

### Table of Contents

|                                                                               |            |
|-------------------------------------------------------------------------------|------------|
| <b>I. GENERAL INFORMATION.....</b>                                            | <b>S1</b>  |
| A. Instrumentation and Methods.....                                           | S1         |
| <b>II. EXPERIMENTAL PROCEDURES AND COMPOUND CHARACTERIZATION.....</b>         | <b>S2</b>  |
| A. Preparation and Characterization of $\beta$ -Lactones and Derivatives..... | S2         |
| B. X-Ray Crystallographic Data.....                                           | S9         |
| C. Selected Spectra.....                                                      | S27        |
| <b>III. ACTIVITY-BASED PROTEIN PROFILING.....</b>                             | <b>S30</b> |
| Supplementary Figure 1.....                                                   | S30        |
| Supplementary Figure 2.....                                                   | S30        |

#### **I. GENERAL INFORMATION**

##### **A. Instrumentation and methods**

<sup>1</sup>H NMR spectra were recorded at 300, 400, or 500 MHz at ambient temperature with CDCl<sub>3</sub>, CD<sub>3</sub>OD, DMSO-d<sub>6</sub> or benzene-d<sub>6</sub> (Cambridge Isotope Laboratories, Inc.) as solvents. Data for <sup>1</sup>H NMR are reported as follows: chemical shift, integration, multiplicity (br = broad, ovrlp = overlapping, s = singlet, d = doublet, t = triplet, q = quartet, m = multiplet) and coupling constants in Hz. <sup>13</sup>C NMR spectra were recorded at 75.0,

100.0, or 125 MHz at ambient temperature with the same solvents unless otherwise stated. Chemical shifts are reported in parts per million relative to the deuterated solvents. All  $^{13}\text{C}$  NMR spectra were recorded with complete proton decoupling. Infrared spectra were recorded on a Nicolet Nexus 670 FT-IR spectrophotometer. High-resolution mass spectra were obtained in the Boston University Chemical Instrumentation Center using a Waters Q-TOF API-US mass spectrometer. Melting points were recorded on a Mel-Temp apparatus (Laboratory Devices). Analytical LC-MS was performed on a Waters Acquity UPLC (Ultra Performance Liquid Chromatography (Waters MassLynx Version 4.1) with a Binary solvent manager, SQ mass spectrometer, Water 2996 PDA (PhotoDiode Array) detector, and ELSD (Evaporative Light Scattering Detector). An Acquity UPLC BEH  $\text{C}_{18}$  1.7  $\mu\text{m}$  column was used for analytical UPLC-MS. Optical rotations were recorded on an AUTOPOL III digital polarimeter at 589 nm, and specific rotations are given  $[\alpha]_{\text{D}}^{20}$  (concentration in grams/100 mL solvent). Chiral HPLC analysis of enantioenriched compounds was performed using a Waters 1525 Binary HPLC Pump with a Waters 2487 diode array detector. Preparative HPLC was performed on a Gilson PLC2020 using a Waters SunFire™ Prep  $\text{C}_{18}$  OBD™ 5 $\mu\text{m}$  19X50 mm column.

Analytical thin layer chromatography was performed using 0.25 mm silica gel 60-F plates. Flash chromatography was performed using 200-400 mesh silica gel (Scientific Absorbents, Inc.). Yields refer to chromatographically and spectroscopically pure materials, unless otherwise stated. HPLC grade tetrahydrofuran, methylene chloride, diethyl ether, toluene, acetonitrile, and benzene were purchased from Fisher and VWR and were purified and dried by passing through a PURE SOLV® solvent purification system (Innovative Technology, Inc.). Other ACS grade solvents for chromatography were purchased from Clean Harbors.

Photochemistry experiments were performed using a Rayonet RPR-100 photochemical reactor equipped with RPR-3500 irradiation lamps (UVA 315-400 nm). Other photochemical reactions were performed in enclosed box using a Hanovia 450 W medium pressure mercury lamp housed in a quartz immersion well, cooled with a Thermo Neslab-ULT 80 system circulator. Pyrex test tubes (16 x 100 mm) were mounted on a support approximately 5.0 cm from the immersion well lamp. All other reactions were carried out in oven-dried glassware under an argon atmosphere unless otherwise noted.

## II. EXPERIMENTAL PROCEDURES AND COMPOUND CHARACTERIZATION

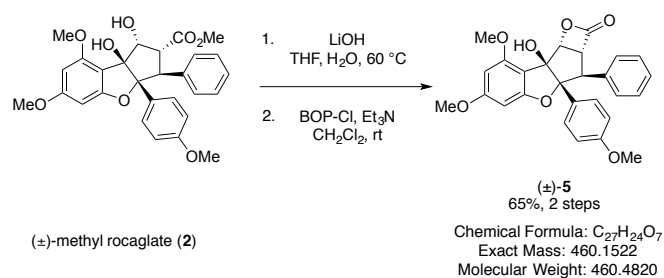

### A. Preparation and characterization of $\beta$ -lactones and derivatives

(±)-(2*aR*,3*S*,3*aR*,8*bS*,8*cR*)-8*b*-Hydroxy-6,8-dimethoxy-3*a*-(4-methoxyphenyl)-3-phenyl-3,3*a*,8*b*,8*c*-tetrahydrooxeto[2',3':3,4]cyclopenta[1,2-

**b]benzofuran-2(2aH)-one 4:** To a 50 mL flask charged with a stir bar was added methyl rocaglate (**2**)<sup>S1</sup> (82 mg, 0.16 mmol, 1.0 equiv) and THF (6.0 mL). To the stirring solution was added a solution of LiOH (20.0 mg, 0.83 mmol, 5.0 equiv) in water (4.0 mL). The resulting yellow solution was then heated at 60 °C for 5 h. The reaction was then cooled to rt, and diethyl ether (5 mL) and hydrochloric acid (1 N) were added. Hydrochloric acid (1 N) was added until the water layer reached a pH of ~ 2 (3 mL). The organic phase was then separated and the aqueous layer was then further extracted with diethyl ether (3 X 10 mL). The combined organic layers were washed with brine, dried over sodium sulfate, filtered and concentrated *in vacuo* to afford rocagloic acid (not depicted) as a yellow foam (79 mg, quantitative). The crude product was used in the next step without further purification. A dry 10 mL flask was charged with rocagloic acid (79 mg, 0.16 mmol, 1.0 equiv) from the previous step, a stir bar, and dichloromethane under argon. The resulting solution was then cooled to 0 °C. Triethylamine (69  $\mu$ L, 0.50 mmol, 3.0 equiv) and *bis*(2-oxo-3-oxazolidinyl)phosphinic chloride (BOP-Cl, 55 mg, 0.22 mmol, 1.3 equiv) were subsequently added. The reaction mixture was warmed to rt and stirred for 1 h. Water (4 mL) and CH<sub>2</sub>Cl<sub>2</sub> (4 mL) were added and the organic phase was separated. The aqueous layer was then further extracted with CH<sub>2</sub>Cl<sub>2</sub> (3 X 10 mL). The combined organic layers were washed with dried over sodium sulfate, filtered and concentrated *in vacuo* to afford a yellow foam. Please note that without the aqueous workup (*i.e.* directly loading the concentrated reaction mixture on silica) we observed a significantly diminished yield of **5** after chromatography. The crude yellow solid was purified by column chromatography (elutes at 35:65 EtOAc/hexanes) to afford  $\beta$ -lactone **5** as a white solid (49 mg, 0.11 mmol, 65%). The product was crystallized *via* slow evaporation from toluene. *R<sub>f</sub>* = 0.48 (1:1 EtOAc/hexanes); **m.p.** 184-185 °C; **IR** *v*<sub>max</sub> (film): 3438, 2939, 2839, 1830, 1600, 1514, 1454, 1252, 1218, 1182, 1147, 1128, 1037, 819, 735 cm<sup>-1</sup>; **<sup>1</sup>H NMR** (400 MHz, CDCl<sub>3</sub>)  $\delta$  7.15-7.14 (ovrlp m, 3H), 7.03 (d, *J* = 8.8 Hz, 2H), 6.98-6.95 (m, 2H), 6.64 (d, *J* = 8.8 Hz, 2H), 6.24 (d, *J* = 2.0 Hz, 1H), 6.09 (d, *J* = 2.0 Hz, 1H), 5.41 (d, *J* = 5.0 Hz, 1H), 4.55 (dd, *J* = 5.6, 5.0 Hz, 1H), 4.10 (d, *J* = 5.6 Hz, 1H), 3.82 (s, 3H), 3.81 (s, 3H), 3.70 (s, 3H), 2.64 (s, 1H); **<sup>13</sup>C NMR** (100 MHz, CD<sub>3</sub>Cl)  $\delta$  169.3, 164.2, 160.0, 159.0, 157.7, 137.1, 128.8 (2C), 128.7 (2C), 128.2 (2C), 127.3, 126.6, 112.9 (2C), 108.1, 106.8, 93.1, 89.8, 89.7, 83.0, 60.3, 55.8, 55.7, 55.2, 54.8; **HR-MS:** *m/z* Calcd for [C<sub>27</sub>H<sub>24</sub>O<sub>7</sub>+H]<sup>+</sup> 461.1600, found 461.1597 (-0.65 ppm).

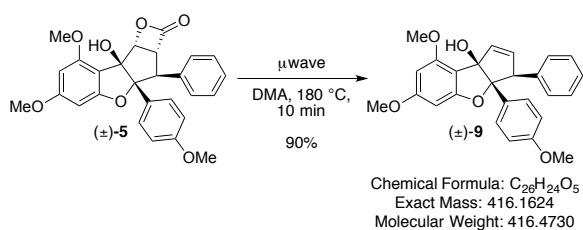

**(±)-(3S,3aR,8bR)-6,8-Dimethoxy-3a-(4-methoxyphenyl)-3-phenyl-3,3a-dihydro-8bH-cyclopenta[b]benzofuran-8b-ol**

**9:** To a microwave vial was added  $\beta$ -lactone **5** (11 mg, 0.024 mmol, 1 equiv), a stir bar, and *N,N*-dimethylacetamide (0.5 mL). The mixture was then heated at 180 °C for 10 min.

Water was then added (2 mL) and the mixture was extracted with EtOAc (3 X 5 mL). The combined organic

<sup>S1</sup> Synthesis of methyl rocaglate (**2**): Roche, S. P.; Cencic, R.; Pelletier J.; Porco, J. A., Jr. *Angew. Chem., Int. Ed.* **2010**, *49*, 6533–6538.

extracts were then washed with a 1:4 mixture of brine/water (3 X 5 mL), washed with brine, and dried over sodium sulfate. The extracts were then filtered and concentrated *in vacuo* to afford a yellow foam. The crude solid was then purified by column chromatography (3:7 EtOAc/hexanes) to afford a white solid (9 mg, 0.022 mmol, 90%).  $R_f = 0.16$  (25:75 EtOAc/hexanes); **m.p.** 130–133 °C; **IR**  $\nu_{\text{max}}$  (film): 3463, 2956, 1614, 1600, 1514, 1499, 1453, 1247, 1219, 1201, 1147, 1111, 1031, 814  $\text{cm}^{-1}$ ;  **$^1\text{H NMR}$**  (400 MHz,  $\text{CDCl}_3$ )  $\delta$  7.18 (d,  $J = 8.8$  Hz, 2H), 7.12–7.01 (ovrlp m, 5H), 6.60 (d,  $J = 8.8$  Hz, 2H), 6.55 (dd,  $J = 6.2, 2.6$  Hz, 1H), 6.30 (dd,  $J = 6.2, 2.0$  Hz, 1H), 6.28 (d,  $J = 2.0$  Hz, 1H), 6.09 (d,  $J = 2.0$  Hz, 1H), 4.37 (dd,  $J = 2.6, 2.0$  Hz, 1H), 3.85 (s, 3H), 3.84 (s, 3H), 3.67 (s, 3H), 1.90 (s, 1H);  **$^{13}\text{C NMR}$**  (125 MHz,  $\text{CD}_3\text{Cl}$ )  $\delta$  163.5, 160.3, 158.6, 157.3, 139.2, 135.5, 133.8, 128.6 (2C), 128.1 (2C), 127.9 (2C), 127.6, 126.5, 112.6 (2C), 109.7, 106.8, 92.5, 92.1, 89.1, 62.0, 55.8, 55.7, 55.1; **HR-MS**:  $m/z$  Calcd for  $[\text{C}_{26}\text{H}_{24}\text{O}_5 + \text{Na}]^+$  439.1521, found 439.1516 (-1.1 ppm).

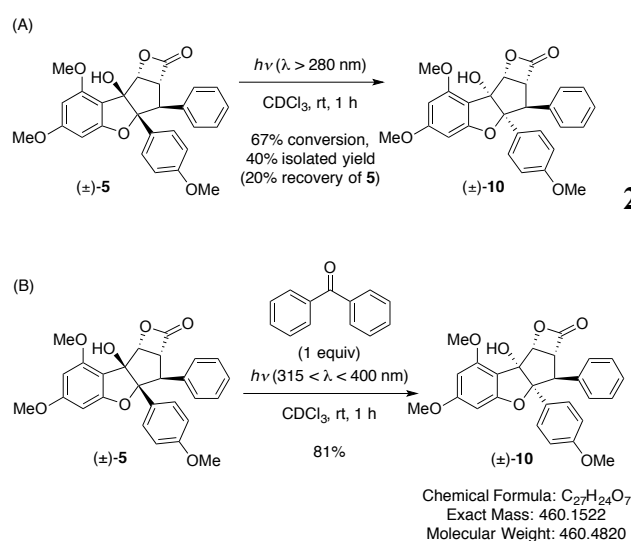

**(±)-(2a*R*,3*S*,3a*S*,8b*R*,8c*R*)-8b-Hydroxy-6,8-dimethoxy-3a-(4-methoxyphenyl)-3-phenyl-3,3a,8b,8c-tetrahydrooxeto[2',3':3,4]cyclopenta[1,2-*b*]benzofuran-**

**2(2a*H*)-one 10**: Procedure (A): To an NMR tube was added a solution of **5** (10 mg, 0.022 mmol, 1 equiv) in  $\text{CDCl}_3$  (1.0 mL). The solution was then degassed with argon for 2 min and sealed. The sample was then irradiated using the Hanovia lamp set up (*vide supra*) at rt for 1 h and the reaction was monitored using  $^1\text{H NMR}$ . Please note that an NMR tube was used not only for reaction monitoring,

but also for a higher conversion due to the better surface area/volume ratio than that of a test tube. The reaction mixture was concentrated and purified *via* preparative TLC (3:7 EtOAc/hexanes, two migrations) to afford  $\beta$ -lactone **10** as a white solid (4 mg, 0.0087 mmol, 40%).  $\beta$ -Lactone **5** was recovered (2 mg, 0.0043 mmol, 20%). Procedure (B): To a test tube was added  $\beta$ -lactone **5** (11 mg, 0.024 mmol), benzophenone (4 mg, 0.024 mmol, 1 equiv) and  $\text{CDCl}_3$  (1.0 mL). After degassing for 2 min with  $\text{N}_2$ , the solution was then irradiated in the Rayonet photoreactor for 2.5 h (cooling fan was turned on). The crude mixture was concentrated and purified by preparative TLC (3:7 EtOAc/hexanes, two migrations) to afford  $\beta$ -lactone **10** as a white solid (9 mg, 0.020 mmol, 81%). Compound **10** was crystallized by vapor diffusion using benzene/hexanes.  $R_f = 0.52$  (1:1 EtOAc/hexanes); **m.p.** 125 °C; **IR**  $\nu_{\text{max}}$  (film): 3466, 2939, 2839, 1827, 1597, 1514, 1201, 1150  $\text{cm}^{-1}$ ;  **$^1\text{H NMR}$**  (400 MHz,  $\text{CDCl}_3$ )  $\delta$  7.50 (d,  $J = 8.8$  Hz, 2H), 7.12 (br t,  $J = 7.0$  Hz, 1H), 6.97 (d,  $J = 8.8$  Hz, 2H), 6.73 (br dd,  $J = 7.0, 7.0$  Hz, 2H), 6.03 (d,  $J = 2.0$  Hz, 1H), 5.72 (d,  $J = 4.6$  Hz, 1H), 5.40 (d,  $J = 2.0$  Hz, 1H), 4.49 (br d,  $J = 2.0$  Hz, 1H), 4.34 (dd,  $J = 4.6, 2.0$  Hz, 1H), 3.88 (s, 3H), 3.84 (s, 3H), 3.61 (s, 3H), 2.19 (s, 1H);  **$^{13}\text{C NMR}$**  (100 MHz,  $\text{CD}_3\text{Cl}$ )  $\delta$  169.8, 164.7, 162.0, 159.9, 157.9, 137.9,

129.3, 128.6 (2C), 128.3 (2C), 127.7 (2C), 127.0, 114.0 (2C), 104.7, 102.1, 92.7, 88.2, 88.0 (2C), 77.5, 59.3, 55.7, 55.4, 53.2; **HR-MS**:  $m/z$  Calcd for  $[C_{27}H_{24}O_7-H_2O]^+$  443.1495, found 443.1490 (-1.1 ppm).

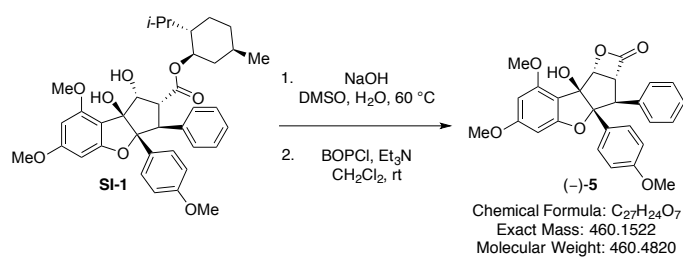

**(-)-(2aR,3S,3aR,8bS,8cR)-8b-Hydroxy-6,8-dimethoxy-3a-(4-methoxyphenyl)-3-phenyl-3,3a,8b,8c-tetrahydrooxeto[2',3':3,4]cyclopenta[1,2-**

**b]benzofuran-2(2aH)-one 5**: Menthyl ester **SI-1** was

prepared from ( $\pm$ )-methyl rocaglate (**2**) using previously reported methods.<sup>S2</sup> A round bottom flask was charged with menthyl ester **SI-1** (12.0 mg, 0.0194 mmol, 1.0 equiv), DMSO (0.7 mL), and a stir bar under argon. A 2.8 N aqueous solution of NaOH (60  $\mu$ L, 0.168 mmol, 8.7 equiv) was then added at rt. The resulting mixture was heated at 60 °C for 3 h. The reaction was cooled to room temperature, acidified to pH  $\sim$  1 using 1N HCl, and extracted with ethyl ether (3 x 10 mL). The combined organic extracts were washed with 1N HCl (4 x 5 mL). The organic phase was dried with sodium sulfate and concentrated. (-)-Rocagloic acid (not shown) was purified by column chromatography (MeOH/CH<sub>2</sub>Cl<sub>2</sub> 2.5:97.5, then flushed with EtOAc/MeOH 9:1) to provide a white solid (5.0 mg, 0.0104 mmol, 54%). (-)- $\beta$ -Lactone **5** was prepared from (-)-rocagloic acid using the same procedure to prepare ( $\pm$ )-**5** from ( $\pm$ )-rocagloic acid. Enantiopurity was determined using analytical chiral HPLC (> 97% ee).  $[\alpha]_D^{26} = -218.2^\circ$  ( $c = 0.1$ , CHCl<sub>3</sub>); other spectroscopic data for compound (-)-**5** were found to be identical to its racemate (see above).

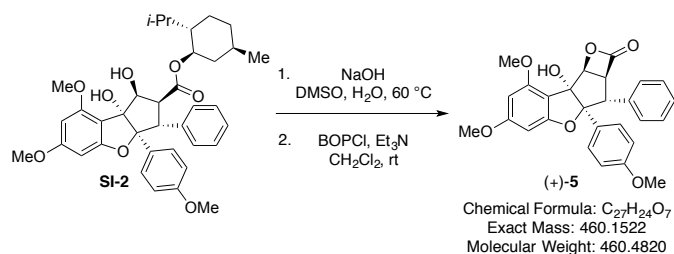

**(+)-(2aR,3S,3aR,8bS,8cR)-8b-Hydroxy-6,8-dimethoxy-3a-(4-methoxyphenyl)-3-phenyl-3,3a,8b,8c-**

**tetrahydrooxeto[2',3':3,4]cyclopenta[1,2-b]benzofuran-2(2aH)-one 5**: Menthyl ester **SI-2** was prepared from ( $\pm$ )-methyl rocaglate (**2**) using previously reported methods.<sup>S2</sup> A round bottom flask was charged with menthyl ester **SI-2** (33.0 mg, 0.0535 mmol, 1.0 equiv), DMSO (2.0 mL), and a stir bar under argon. A 2.8 N aqueous solution of NaOH (152  $\mu$ L, 0.426 mmol, 8.0 equiv) was then added at rt. The resulting mixture was heated at 60 °C for 3 h. The reaction was cooled to room temperature, acidified to pH  $\sim$  1 using 1N HCl, and extracted with ethyl ether (3 x 10 mL). The combined organic extracts were washed with 1N HCl (4 x 5 mL). The organic phase was dried with sodium sulfate and concentrated. (+)-Rocagloic acid (not shown) was purified by column chromatography (MeOH/CH<sub>2</sub>Cl<sub>2</sub> 2.5:97.5, then flushed with EtOAc/MeOH 9:1) to provide a white solid (14.0 mg, 0.0293 mmol, 55%). (+)- $\beta$ -Lactone **5** was prepared from (+)-rocagloic acid

<sup>S2</sup> Rodrigo, C. M.; Cencic, R.; Roche, S. P.; Pelletier, J.; Porco Jr., J. A. *J. Med. Chem.* **2011**, *55*, 558–562.

using the same procedure to prepare ( $\pm$ )-**5** from ( $\pm$ )-rocagloic acid. Enantiopurity was determined using analytical chiral HPLC (>97% ee).  $[\alpha]_D^{26} = +218.2^\circ$  ( $c = 0.1$ ,  $\text{CHCl}_3$ ); other spectroscopic data of compound (+)-**5** are identical to its racemate (see above).

**Analysis of (-)-**5** and (+)-**5**:** Chiral HPLC analysis of ( $\pm$ )-**5**: Regis Pirkle covalent (*R,R*) WHELK-O 1 column was used, with an isocratic mobile phase of isopropanol/hexanes (20:80) with a flow rate of 1.0 mL/min for 60 min.

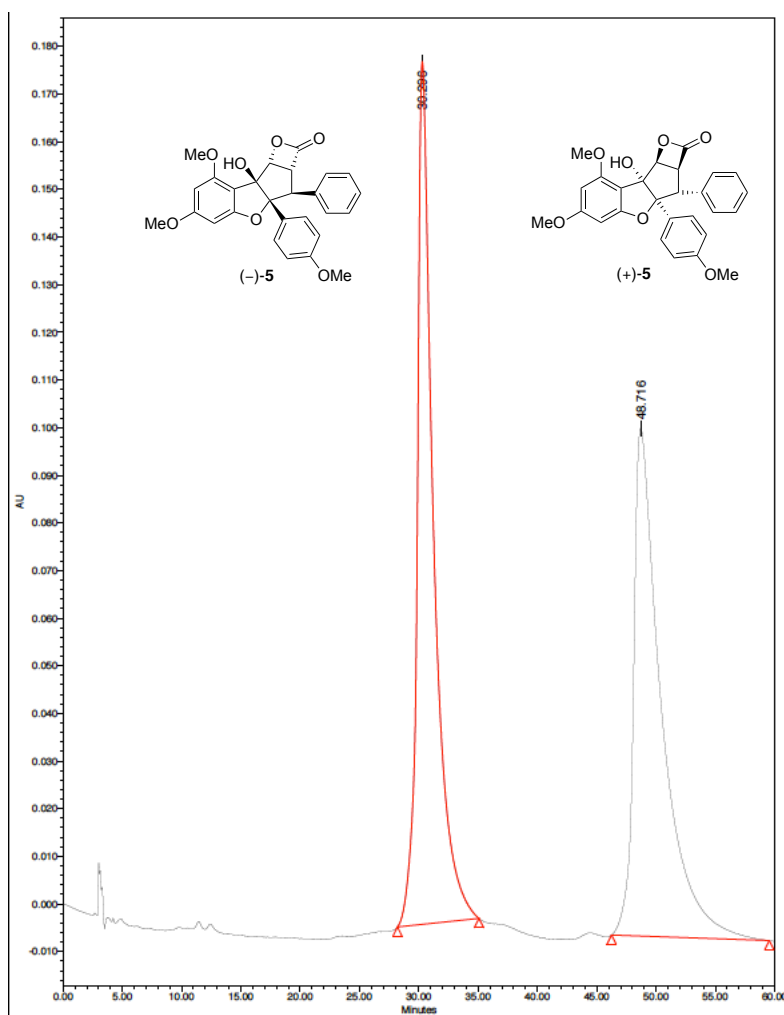

| Name | Retention Time (min) | Area ( $\mu\text{V}\cdot\text{sec}$ ) | % Area | Height ( $\mu\text{V}$ ) | Int Type | Amount | Units | Peak Type | Peak Codes |
|------|----------------------|---------------------------------------|--------|--------------------------|----------|--------|-------|-----------|------------|
| 1    | 30.296               | 17351230                              | 49.95  | 181096                   | bb       |        |       | Unknown   |            |
| 2    | 48.716               | 17383307                              | 50.05  | 106587                   | bb       |        |       | Unknown   |            |

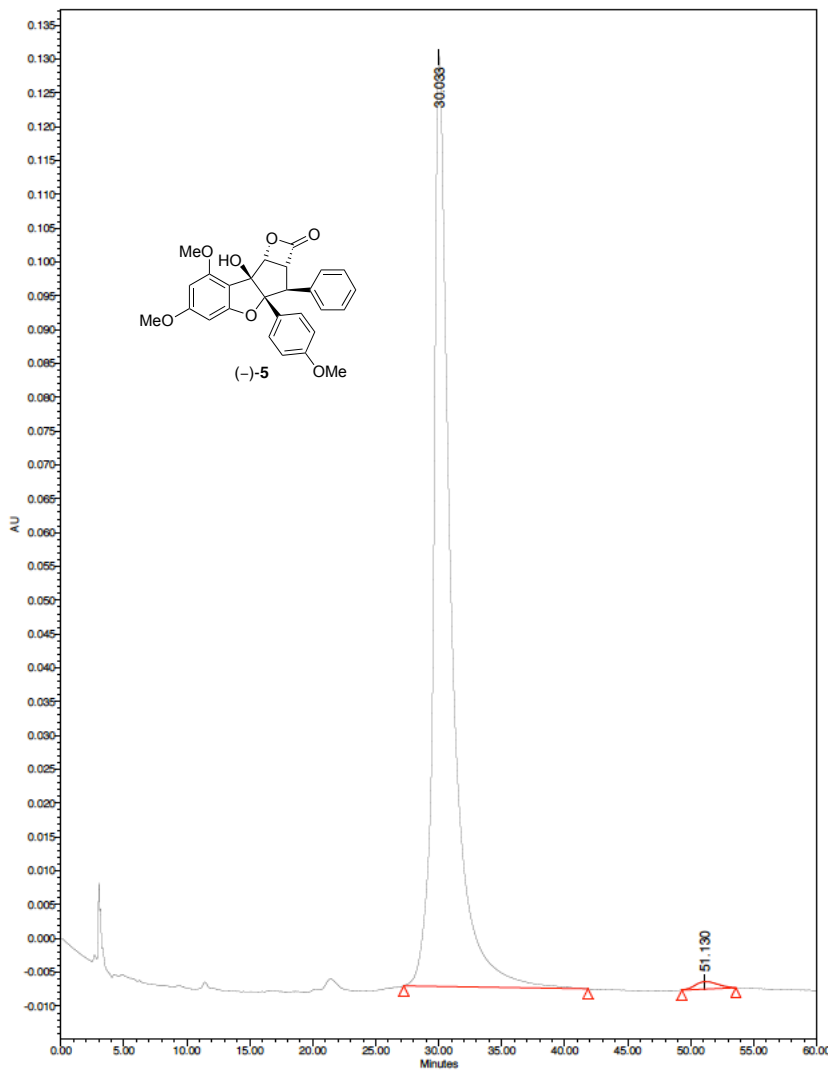

| Name | Retention Time (min) | Area ( $\mu V \cdot sec$ ) | % Area | Height ( $\mu V$ ) | Int Type | Amount | Units | Peak Type | Peak Codes |
|------|----------------------|----------------------------|--------|--------------------|----------|--------|-------|-----------|------------|
| 1    | 30.033               | 13188846                   | 98.77  | 137335             | Bb       |        |       | Unknown   |            |
| 2    | 51.130               | 164004                     | 1.23   | 1191               | bb       |        |       | Unknown   |            |

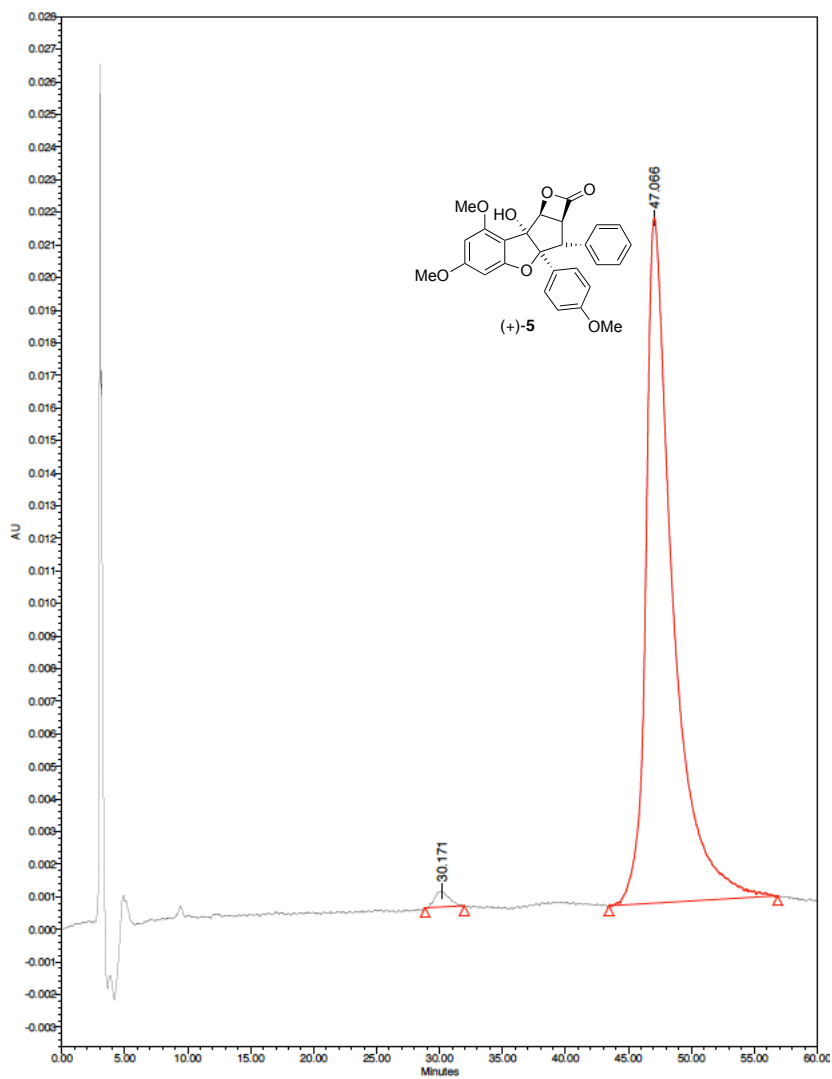

| Name | Retention Time (min) | Area ( $\mu V \cdot sec$ ) | % Area | Height ( $\mu V$ ) | Int Type | Amount | Units | Peak Type | Peak Codes |
|------|----------------------|----------------------------|--------|--------------------|----------|--------|-------|-----------|------------|
| 1    | 30.171               | 38377                      | 1.21   | 476                | bb       |        |       | Unknown   |            |
| 2    | 47.066               | 3134829                    | 98.79  | 21024              | bb       |        |       | Unknown   |            |



## B. X-ray Crystallographic Data

### X-ray crystallographic data for ( $\pm$ )-5

Crystals of compound ( $\pm$ )-5 suitable for X-ray analysis were obtained by slow evaporation from toluene. Crystallographic data have been deposited with the Cambridge Crystallographic Data Centre (CCDC # 943262). Copies of the data can be obtained free of charge through application to the CCDC, 12 Union Road, Cambridge CB21EZ, UK (fax: (+44)- 1223-336-033; e-mail: deposit@ccdc.cam.ac.uk).

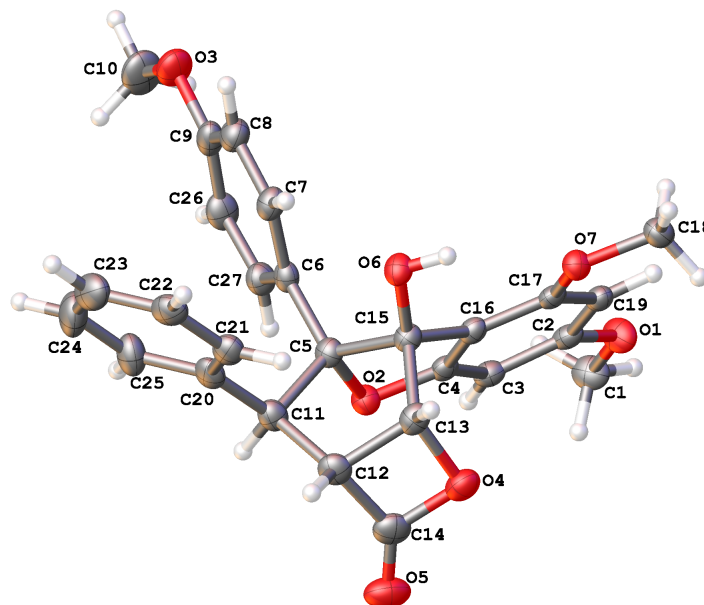

Table SI-1. Crystal data and structure refinement for  $\beta$ -lactone 5.

Identification code 5

#### Crystal data

|                                |                                                         |
|--------------------------------|---------------------------------------------------------|
| $C_{27}H_{24}O_7$              | $V = 2225.7 (2) \text{ \AA}^3$                          |
| $M_r = 460.46$                 | $Z = 4$                                                 |
| Monoclinic, $P2_1/n$           | Cu $K\alpha$ radiation, $\lambda = 1.54178 \text{ \AA}$ |
| $a = 13.0969 (8) \text{ \AA}$  | $\mu = 0.82 \text{ mm}^{-1}$                            |
| $b = 10.2768 (7) \text{ \AA}$  | $T = 100 \text{ K}$                                     |
| $c = 17.7108 (11) \text{ \AA}$ | $0.3 \times 0.1 \times 0.03 \text{ mm}$                 |
| $\beta = 110.980 (3)^\circ$    |                                                         |

#### Data collection

|                                 |                              |
|---------------------------------|------------------------------|
| Bruker Proteum-R diffractometer | 3761 independent reflections |
|---------------------------------|------------------------------|

|                                                                      |                                        |
|----------------------------------------------------------------------|----------------------------------------|
| Absorption correction: multi-scan<br><i>SADABS</i> (Sheldrick, 1997) | 3242 reflections with $I > 2\sigma(I)$ |
| $T_{\min} = 0.691$ , $T_{\max} = 0.753$                              | $R_{\text{int}} = 0.052$               |
| 23432 measured reflections                                           |                                        |

## Refinement

|                                 |                                                                        |
|---------------------------------|------------------------------------------------------------------------|
| $R[F^2 > 2\sigma(F^2)] = 0.048$ | 0 restraints                                                           |
| $wR(F^2) = 0.123$               | H atoms treated by a mixture of independent and constrained refinement |
| $S = 1.14$                      | $\Delta_{\text{max}} = 0.31 \text{ e } \text{\AA}^{-3}$                |
| 3761 reflections                | $\Delta_{\text{min}} = -0.22 \text{ e } \text{\AA}^{-3}$               |
| 313 parameters                  |                                                                        |

Data collection: *APEX2* (Bruker, 2006); cell refinement: *S SAINT* (Bruker, 2006); data reduction: *S SAINT* (Bruker, 2006); program(s) used to solve structure: *SHELXS97* (Sheldrick, 1990); program(s) used to refine structure: *SHELXL97* (Sheldrick, 1997); molecular graphics: *OLEX2* (Dolmanov, *et al.* 2009); software used to prepare material for publication: *PublCIF v.1.9.5\_c* (IUCr).

## Special details

**Geometry.** All esds (except the esd in the dihedral angle between two l.s. planes) are estimated using the full covariance matrix. The cell esds are taken into account individually in the estimation of esds in distances, angles and torsion angles; correlations between esds in cell parameters are only used when they are defined by crystal symmetry. An approximate (isotropic) treatment of cell esds is used for estimating esds involving l.s. planes.

**Refinement.** Refinement of  $F^2$  against ALL reflections. The weighted R-factor  $wR$  and goodness of fit  $S$  are based on  $F^2$ , conventional R-factors  $R$  are based on  $F$ , with  $F$  set to zero for negative  $F^2$ . The threshold expression of  $F^2 > 2\sigma(F^2)$  is used only for calculating R-factors(gt) etc. and is not relevant to the choice of reflections for refinement. R-factors based on  $F^2$  are statistically about twice as large as those based on  $F$ , and R-factors based on ALL data will be even larger.

CheckCIF Alert and Discussion:

PLAT029\_ALERT\_3\_B\_diffn\_measured\_fraction\_theta\_full Low ..... 0.954 Discussion: The diffraction pattern included many reflections with somewhat distorted shapes, resulting in a larger-than normal number of data being rejected during scaling. Though the missing data caused the overall measured fraction to be somewhat low, the structural model is unambiguous and meets the purposes of this crystallographic study.

## Fractional atomic coordinates and isotropic or equivalent isotropic displacement parameters ( $\text{\AA}^2$ )

|    | <i>x</i>     | <i>y</i>     | <i>z</i>     | $U_{\text{iso}}^*/U_{\text{eq}}$ |  |
|----|--------------|--------------|--------------|----------------------------------|--|
| O1 | 0.43058 (12) | 0.84898 (15) | 0.96350 (10) | 0.0314 (4)                       |  |

|      |              |              |              |            |  |
|------|--------------|--------------|--------------|------------|--|
| O2   | 0.14243 (11) | 0.52518 (14) | 0.87848 (8)  | 0.0238 (3) |  |
| O3   | 0.23477 (14) | 0.26063 (19) | 1.21647 (9)  | 0.0406 (4) |  |
| O4   | 0.17904 (13) | 0.48504 (16) | 0.72192 (9)  | 0.0325 (4) |  |
| O5   | 0.00529 (15) | 0.56643 (19) | 0.67774 (10) | 0.0435 (5) |  |
| O6   | 0.30868 (13) | 0.24304 (14) | 0.88130 (9)  | 0.0252 (3) |  |
| H6   | 0.370 (2)    | 0.248 (3)    | 0.8742 (16)  | 0.038*     |  |
| O7   | 0.48210 (11) | 0.42245 (14) | 0.87630 (8)  | 0.0237 (3) |  |
| C1   | 0.36111 (19) | 0.9449 (2)   | 0.97883 (14) | 0.0330 (5) |  |
| H1A  | 0.2993       | 0.9627       | 0.9288       | 0.050*     |  |
| H1B  | 0.4027       | 1.0251       | 0.9981       | 0.050*     |  |
| H1C  | 0.3338       | 0.9124       | 1.0201       | 0.050*     |  |
| C2   | 0.38618 (17) | 0.7300 (2)   | 0.93617 (12) | 0.0238 (5) |  |
| C3   | 0.27690 (17) | 0.6999 (2)   | 0.92154 (12) | 0.0233 (5) |  |
| H3   | 0.2271       | 0.7612       | 0.9291       | 0.028*     |  |
| C4   | 0.24630 (16) | 0.5742 (2)   | 0.89514 (11) | 0.0213 (4) |  |
| C5   | 0.15559 (17) | 0.3824 (2)   | 0.88577 (12) | 0.0229 (5) |  |
| C6   | 0.17561 (16) | 0.3474 (2)   | 0.97355 (12) | 0.0225 (5) |  |
| C7   | 0.22874 (18) | 0.2338 (2)   | 1.01083 (13) | 0.0267 (5) |  |
| H7   | 0.2518       | 0.1726       | 0.9801       | 0.032*     |  |
| C8   | 0.24849 (18) | 0.2087 (2)   | 1.09164 (14) | 0.0308 (5) |  |
| H8   | 0.2873       | 0.1325       | 1.1162       | 0.037*     |  |
| C9   | 0.21173 (18) | 0.2947 (2)   | 1.13715 (13) | 0.0310 (5) |  |
| C10  | 0.1889 (2)   | 0.3419 (3)   | 1.26197 (16) | 0.0514 (8) |  |
| H10A | 0.2180       | 0.4303       | 1.2647       | 0.077*     |  |
| H10B | 0.2081       | 0.3070       | 1.3168       | 0.077*     |  |
| H10C | 0.1091       | 0.3439       | 1.2355       | 0.077*     |  |
| C11  | 0.05132 (17) | 0.3250 (2)   | 0.82092 (12) | 0.0263 (5) |  |
| H11  | -0.0136      | 0.3773       | 0.8197       | 0.032*     |  |
| C12  | 0.07092 (18) | 0.3452 (2)   | 0.74117 (13) | 0.0282 (5) |  |
| H12  | 0.0336       | 0.2794       | 0.6987       | 0.034*     |  |
| C13  | 0.19450 (18) | 0.3547 (2)   | 0.76042 (13) | 0.0261 (5) |  |
| H13  | 0.2245       | 0.2874       | 0.7332       | 0.031*     |  |
| C14  | 0.06962 (19) | 0.4825 (3)   | 0.70820 (13) | 0.0327 (5) |  |
| C15  | 0.25227 (16) | 0.3605 (2)   | 0.85373 (12) | 0.0219 (4) |  |
| C16  | 0.31497 (16) | 0.4834 (2)   | 0.88265 (11) | 0.0207 (4) |  |
| C17  | 0.42213 (16) | 0.5170 (2)   | 0.89473 (11) | 0.0212 (4) |  |
| C18  | 0.59190 (17) | 0.4541 (2)   | 0.88465 (13) | 0.0286 (5) |  |
| H18A | 0.5913       | 0.5261       | 0.8482       | 0.043*     |  |
| H18B | 0.6267       | 0.3779       | 0.8708       | 0.043*     |  |

|      |               |             |              |            |  |
|------|---------------|-------------|--------------|------------|--|
| H18C | 0.6329        | 0.4799      | 0.9406       | 0.043*     |  |
| C19  | 0.45886 (17)  | 0.6408 (2)  | 0.92346 (12) | 0.0228 (5) |  |
| H19  | 0.5329        | 0.6645      | 0.9344       | 0.027*     |  |
| C20  | 0.03269 (17)  | 0.1840 (2)  | 0.83627 (13) | 0.0279 (5) |  |
| C21  | 0.08037 (18)  | 0.0824 (2)  | 0.80873 (13) | 0.0288 (5) |  |
| H21  | 0.1255        | 0.1012      | 0.7784       | 0.035*     |  |
| C22  | 0.06290 (19)  | -0.0460 (2) | 0.82499 (14) | 0.0340 (6) |  |
| H22  | 0.0952        | -0.1143     | 0.8051       | 0.041*     |  |
| C23  | -0.0011 (2)   | -0.0749 (3) | 0.86973 (15) | 0.0422 (6) |  |
| H23  | -0.0126       | -0.1628     | 0.8811       | 0.051*     |  |
| C24  | -0.0484 (2)   | 0.0249 (3)  | 0.89801 (17) | 0.0469 (7) |  |
| H24  | -0.0923       | 0.0055      | 0.9291       | 0.056*     |  |
| C25  | -0.03207 (19) | 0.1530 (3)  | 0.88127 (15) | 0.0379 (6) |  |
| H25  | -0.0655       | 0.2208      | 0.9007       | 0.046*     |  |
| C26  | 0.15567 (19)  | 0.4055 (3)  | 1.10066 (14) | 0.0328 (5) |  |
| H26  | 0.1287        | 0.4639      | 1.1307       | 0.039*     |  |
| C27  | 0.13885 (17)  | 0.4315 (2)  | 1.01994 (13) | 0.0281 (5) |  |
| H27  | 0.1013        | 0.5086      | 0.9959       | 0.034*     |  |

### Atomic displacement parameters ( $\text{\AA}^2$ )

|     | $U^{11}$    | $U^{22}$    | $U^{33}$    | $U^{12}$     | $U^{13}$    | $U^{23}$     |
|-----|-------------|-------------|-------------|--------------|-------------|--------------|
| O1  | 0.0327 (8)  | 0.0185 (8)  | 0.0394 (9)  | -0.0036 (6)  | 0.0084 (7)  | -0.0046 (7)  |
| O2  | 0.0245 (7)  | 0.0212 (8)  | 0.0260 (7)  | -0.0005 (6)  | 0.0094 (6)  | -0.0022 (6)  |
| O3  | 0.0452 (10) | 0.0550 (12) | 0.0237 (8)  | -0.0082 (9)  | 0.0148 (7)  | -0.0001 (8)  |
| O4  | 0.0401 (9)  | 0.0329 (10) | 0.0243 (8)  | -0.0022 (7)  | 0.0111 (7)  | 0.0031 (7)   |
| O5  | 0.0505 (11) | 0.0479 (12) | 0.0278 (9)  | 0.0131 (9)   | 0.0088 (8)  | 0.0041 (8)   |
| O6  | 0.0279 (8)  | 0.0191 (8)  | 0.0313 (8)  | -0.0004 (6)  | 0.0139 (6)  | -0.0009 (6)  |
| O7  | 0.0243 (7)  | 0.0229 (8)  | 0.0251 (7)  | -0.0002 (6)  | 0.0105 (6)  | -0.0016 (6)  |
| C1  | 0.0378 (13) | 0.0205 (13) | 0.0364 (13) | -0.0009 (10) | 0.0080 (10) | -0.0057 (10) |
| C2  | 0.0319 (11) | 0.0191 (12) | 0.0167 (10) | -0.0029 (9)  | 0.0042 (8)  | 0.0019 (8)   |
| C3  | 0.0291 (11) | 0.0201 (11) | 0.0198 (10) | 0.0029 (9)   | 0.0078 (8)  | 0.0014 (8)   |
| C4  | 0.0251 (10) | 0.0231 (12) | 0.0153 (9)  | -0.0018 (8)  | 0.0069 (8)  | 0.0015 (8)   |
| C5  | 0.0252 (11) | 0.0192 (11) | 0.0242 (10) | -0.0026 (8)  | 0.0089 (9)  | -0.0025 (8)  |
| C6  | 0.0218 (10) | 0.0232 (12) | 0.0236 (10) | -0.0062 (8)  | 0.0094 (8)  | -0.0050 (9)  |
| C7  | 0.0317 (11) | 0.0239 (12) | 0.0275 (11) | -0.0042 (9)  | 0.0143 (9)  | -0.0020 (9)  |
| C8  | 0.0326 (12) | 0.0298 (13) | 0.0306 (12) | -0.0053 (10) | 0.0123 (10) | 0.0017 (10)  |
| C9  | 0.0290 (11) | 0.0412 (15) | 0.0240 (11) | -0.0125 (10) | 0.0109 (9)  | -0.0028 (10) |
| C10 | 0.0589 (17) | 0.074 (2)   | 0.0285 (13) | -0.0092 (15) | 0.0241 (13) | -0.0062 (13) |

|     |             |             |             |              |             |              |
|-----|-------------|-------------|-------------|--------------|-------------|--------------|
| C11 | 0.0246 (11) | 0.0308 (13) | 0.0232 (11) | -0.0025 (9)  | 0.0081 (9)  | -0.0052 (9)  |
| C12 | 0.0306 (11) | 0.0310 (13) | 0.0205 (10) | -0.0030 (10) | 0.0061 (9)  | -0.0066 (9)  |
| C13 | 0.0341 (12) | 0.0225 (12) | 0.0232 (11) | -0.0031 (9)  | 0.0120 (9)  | -0.0030 (9)  |
| C14 | 0.0378 (13) | 0.0392 (15) | 0.0192 (10) | 0.0020 (11)  | 0.0080 (9)  | -0.0025 (10) |
| C15 | 0.0252 (10) | 0.0194 (11) | 0.0218 (10) | -0.0011 (8)  | 0.0093 (8)  | -0.0015 (8)  |
| C16 | 0.0257 (10) | 0.0192 (11) | 0.0172 (9)  | -0.0021 (8)  | 0.0075 (8)  | -0.0002 (8)  |
| C17 | 0.0261 (10) | 0.0220 (11) | 0.0151 (9)  | 0.0002 (8)   | 0.0068 (8)  | 0.0038 (8)   |
| C18 | 0.0240 (11) | 0.0330 (14) | 0.0276 (11) | 0.0002 (9)   | 0.0077 (9)  | 0.0008 (10)  |
| C19 | 0.0241 (10) | 0.0238 (12) | 0.0184 (10) | -0.0029 (9)  | 0.0050 (8)  | 0.0032 (8)   |
| C20 | 0.0231 (10) | 0.0329 (13) | 0.0230 (10) | -0.0085 (9)  | 0.0026 (8)  | -0.0061 (9)  |
| C21 | 0.0281 (11) | 0.0314 (13) | 0.0229 (11) | -0.0065 (10) | 0.0043 (9)  | -0.0030 (9)  |
| C22 | 0.0329 (12) | 0.0337 (14) | 0.0274 (11) | -0.0050 (10) | 0.0011 (10) | -0.0029 (10) |
| C23 | 0.0407 (14) | 0.0363 (15) | 0.0412 (14) | -0.0155 (12) | 0.0047 (11) | 0.0005 (12)  |
| C24 | 0.0423 (15) | 0.0547 (19) | 0.0490 (16) | -0.0194 (13) | 0.0228 (13) | -0.0019 (13) |
| C25 | 0.0329 (12) | 0.0427 (16) | 0.0418 (14) | -0.0130 (11) | 0.0179 (11) | -0.0092 (11) |
| C26 | 0.0335 (12) | 0.0402 (15) | 0.0290 (12) | -0.0037 (10) | 0.0165 (10) | -0.0089 (10) |
| C27 | 0.0265 (11) | 0.0316 (13) | 0.0283 (11) | -0.0016 (9)  | 0.0122 (9)  | -0.0025 (9)  |

#### Geometric parameters (Å, °)

|        |           |          |           |
|--------|-----------|----------|-----------|
| O1—C2  | 1.366 (3) | C10—H10B | 0.9800    |
| O1—C1  | 1.431 (3) | C10—H10C | 0.9800    |
| O2—C4  | 1.380 (2) | C11—C20  | 1.510 (3) |
| O2—C5  | 1.478 (3) | C11—C12  | 1.537 (3) |
| O3—C9  | 1.372 (3) | C11—H11  | 1.0000    |
| O3—C10 | 1.433 (3) | C12—C14  | 1.524 (3) |
| O4—C14 | 1.365 (3) | C12—C13  | 1.533 (3) |
| O4—C13 | 1.484 (3) | C12—H12  | 1.0000    |
| O5—C14 | 1.191 (3) | C13—C15  | 1.553 (3) |
| O6—C15 | 1.408 (3) | C13—H13  | 1.0000    |
| O6—H6  | 0.86 (3)  | C15—C16  | 1.494 (3) |
| O7—C17 | 1.361 (2) | C16—C17  | 1.385 (3) |
| O7—C18 | 1.429 (3) | C17—C19  | 1.391 (3) |
| C1—H1A | 0.9800    | C18—H18A | 0.9800    |
| C1—H1B | 0.9800    | C18—H18B | 0.9800    |
| C1—H1C | 0.9800    | C18—H18C | 0.9800    |
| C2—C3  | 1.395 (3) | C19—H19  | 0.9500    |
| C2—C19 | 1.397 (3) | C20—C21  | 1.391 (3) |
| C3—C4  | 1.383 (3) | C20—C25  | 1.393 (3) |

|            |             |               |             |
|------------|-------------|---------------|-------------|
| C3—H3      | 0.9500      | C21—C22       | 1.386 (3)   |
| C4—C16     | 1.368 (3)   | C21—H21       | 0.9500      |
| C5—C6      | 1.524 (3)   | C22—C23       | 1.376 (4)   |
| C5—C11     | 1.552 (3)   | C22—H22       | 0.9500      |
| C5—C15     | 1.578 (3)   | C23—C24       | 1.382 (4)   |
| C6—C27     | 1.392 (3)   | C23—H23       | 0.9500      |
| C6—C7      | 1.397 (3)   | C24—C25       | 1.383 (4)   |
| C7—C8      | 1.385 (3)   | C24—H24       | 0.9500      |
| C7—H7      | 0.9500      | C25—H25       | 0.9500      |
| C8—C9      | 1.393 (3)   | C26—C27       | 1.392 (3)   |
| C8—H8      | 0.9500      | C26—H26       | 0.9500      |
| C9—C26     | 1.384 (4)   | C27—H27       | 0.9500      |
| C10—H10A   | 0.9800      |               |             |
|            |             |               |             |
| C2—O1—C1   | 117.67 (17) | C11—C12—H12   | 113.7       |
| C4—O2—C5   | 105.59 (15) | O4—C13—C12    | 89.74 (16)  |
| C9—O3—C10  | 116.4 (2)   | O4—C13—C15    | 112.87 (17) |
| C14—O4—C13 | 91.51 (16)  | C12—C13—C15   | 108.21 (16) |
| C15—O6—H6  | 107.7 (18)  | O4—C13—H13    | 114.5       |
| C17—O7—C18 | 117.30 (17) | C12—C13—H13   | 114.5       |
| O1—C1—H1A  | 109.5       | C15—C13—H13   | 114.5       |
| O1—C1—H1B  | 109.5       | O5—C14—O4     | 126.4 (2)   |
| H1A—C1—H1B | 109.5       | O5—C14—C12    | 138.8 (2)   |
| O1—C1—H1C  | 109.5       | O4—C14—C12    | 94.73 (18)  |
| H1A—C1—H1C | 109.5       | O6—C15—C16    | 116.77 (17) |
| H1B—C1—H1C | 109.5       | O6—C15—C13    | 109.35 (17) |
| O1—C2—C3   | 122.89 (19) | C16—C15—C13   | 113.32 (17) |
| O1—C2—C19  | 114.61 (19) | O6—C15—C5     | 112.74 (17) |
| C3—C2—C19  | 122.5 (2)   | C16—C15—C5    | 99.75 (16)  |
| C4—C3—C2   | 115.09 (19) | C13—C15—C5    | 103.90 (16) |
| C4—C3—H3   | 122.5       | C4—C16—C17    | 119.58 (19) |
| C2—C3—H3   | 122.5       | C4—C16—C15    | 108.65 (18) |
| C16—C4—O2  | 111.81 (18) | C17—C16—C15   | 131.73 (19) |
| C16—C4—C3  | 124.32 (19) | O7—C17—C16    | 115.14 (18) |
| O2—C4—C3   | 123.87 (18) | O7—C17—C19    | 125.97 (18) |
| O2—C5—C6   | 107.19 (16) | C16—C17—C19   | 118.89 (19) |
| O2—C5—C11  | 105.58 (17) | O7—C18—H18A   | 109.5       |
| C6—C5—C11  | 116.72 (17) | O7—C18—H18B   | 109.5       |
| O2—C5—C15  | 101.17 (15) | H18A—C18—H18B | 109.5       |

|               |              |                     |             |
|---------------|--------------|---------------------|-------------|
| C6—C5—C15     | 117.77 (17)  | O7—C18—H18C         | 109.5       |
| C11—C5—C15    | 106.64 (16)  | H18A—C18—H18C       | 109.5       |
| C27—C6—C7     | 117.3 (2)    | H18B—C18—H18C       | 109.5       |
| C27—C6—C5     | 119.09 (19)  | C17—C19—C2          | 119.54 (19) |
| C7—C6—C5      | 123.62 (19)  | C17—C19—H19         | 120.2       |
| C8—C7—C6      | 121.4 (2)    | C2—C19—H19          | 120.2       |
| C8—C7—H7      | 119.3        | C21—C20—C25         | 118.1 (2)   |
| C6—C7—H7      | 119.3        | C21—C20—C11         | 122.4 (2)   |
| C7—C8—C9      | 120.3 (2)    | C25—C20—C11         | 119.5 (2)   |
| C7—C8—H8      | 119.9        | C22—C21—C20         | 120.9 (2)   |
| C9—C8—H8      | 119.9        | C22—C21—H21         | 119.6       |
| O3—C9—C26     | 125.0 (2)    | C20—C21—H21         | 119.6       |
| O3—C9—C8      | 115.8 (2)    | C23—C22—C21         | 120.3 (2)   |
| C26—C9—C8     | 119.2 (2)    | C23—C22—H22         | 119.8       |
| O3—C10—H10A   | 109.5        | C21—C22—H22         | 119.8       |
| O3—C10—H10B   | 109.5        | C22—C23—C24         | 119.5 (3)   |
| H10A—C10—H10B | 109.5        | C22—C23—H23         | 120.2       |
| O3—C10—H10C   | 109.5        | C24—C23—H23         | 120.2       |
| H10A—C10—H10C | 109.5        | C23—C24—C25         | 120.3 (2)   |
| H10B—C10—H10C | 109.5        | C23—C24—H24         | 119.8       |
| C20—C11—C12   | 112.71 (18)  | C25—C24—H24         | 119.8       |
| C20—C11—C5    | 112.80 (18)  | C24—C25—C20         | 120.8 (2)   |
| C12—C11—C5    | 103.67 (17)  | C24—C25—H25         | 119.6       |
| C20—C11—H11   | 109.2        | C20—C25—H25         | 119.6       |
| C12—C11—H11   | 109.2        | C9—C26—C27          | 120.0 (2)   |
| C5—C11—H11    | 109.2        | C9—C26—H26          | 120.0       |
| C14—C12—C13   | 83.84 (17)   | C27—C26—H26         | 120.0       |
| C14—C12—C11   | 119.63 (19)  | C6—C27—C26          | 121.8 (2)   |
| C13—C12—C11   | 108.33 (17)  | C6—C27—H27          | 119.1       |
| C14—C12—H12   | 113.7        | C26—C27—H27         | 119.1       |
| C13—C12—H12   | 113.7        |                     |             |
|               |              |                     |             |
| C1—O1—C2—C3   | 1.1 (3)      | C12—C13—C15—<br>C16 | -118.3 (2)  |
| C1—O1—C2—C19  | -179.25 (18) | O4—C13—C15—C5       | 86.7 (2)    |
| O1—C2—C3—C4   | -179.11 (18) | C12—C13—C15—C5      | -11.0 (2)   |
| C19—C2—C3—C4  | 1.3 (3)      | O2—C5—C15—O6        | 157.65 (15) |
| C5—O2—C4—C16  | 22.6 (2)     | C6—C5—C15—O6        | 41.3 (2)    |
| C5—O2—C4—C3   | -157.22 (19) | C11—C5—C15—O6       | -92.2 (2)   |

|                     |              |                     |              |
|---------------------|--------------|---------------------|--------------|
| C2—C3—C4—C16        | -0.7 (3)     | O2—C5—C15—C16       | 33.08 (18)   |
| C2—C3—C4—O2         | 179.09 (17)  | C6—C5—C15—C16       | -83.3 (2)    |
| C4—O2—C5—C6         | 89.51 (17)   | C11—C5—C15—C16      | 143.25 (17)  |
| C4—O2—C5—C11        | -145.39 (15) | O2—C5—C15—C13       | -84.07 (17)  |
| C4—O2—C5—C15        | -34.41 (18)  | C6—C5—C15—C13       | 159.55 (18)  |
| O2—C5—C6—C27        | 24.0 (2)     | C11—C5—C15—C13      | 26.1 (2)     |
| C11—C5—C6—C27       | -94.1 (2)    | O2—C4—C16—C17       | 178.56 (17)  |
| C15—C5—C6—C27       | 137.1 (2)    | C3—C4—C16—C17       | -1.6 (3)     |
| O2—C5—C6—C7         | -156.51 (18) | O2—C4—C16—C15       | 0.7 (2)      |
| C11—C5—C6—C7        | 85.4 (2)     | C3—C4—C16—C15       | -179.53 (18) |
| C15—C5—C6—C7        | -43.4 (3)    | O6—C15—C16—C4       | -143.30 (17) |
| C27—C6—C7—C8        | -2.9 (3)     | C13—C15—C16—C4      | 88.3 (2)     |
| C5—C6—C7—C8         | 177.6 (2)    | C5—C15—C16—C4       | -21.6 (2)    |
| C6—C7—C8—C9         | 2.5 (3)      | O6—C15—C16—C17      | 39.2 (3)     |
| C10—O3—C9—C26       | 5.3 (3)      | C13—C15—C16—<br>C17 | -89.3 (3)    |
| C10—O3—C9—C8        | -174.5 (2)   | C5—C15—C16—C17      | 160.9 (2)    |
| C7—C8—C9—O3         | 179.6 (2)    | C18—O7—C17—C16      | 177.57 (17)  |
| C7—C8—C9—C26        | -0.2 (3)     | C18—O7—C17—C19      | -2.1 (3)     |
| O2—C5—C11—C20       | -161.72 (16) | C4—C16—C17—O7       | -176.40 (17) |
| C6—C5—C11—C20       | -42.8 (3)    | C15—C16—C17—O7      | 0.9 (3)      |
| C15—C5—C11—C20      | 91.2 (2)     | C4—C16—C17—C19      | 3.3 (3)      |
| O2—C5—C11—C12       | 76.06 (19)   | C15—C16—C17—<br>C19 | -179.37 (19) |
| C6—C5—C11—C12       | -165.00 (18) | O7—C17—C19—C2       | 176.99 (18)  |
| C15—C5—C11—C12      | -31.0 (2)    | C16—C17—C19—C2      | -2.7 (3)     |
| C20—C11—C12—<br>C14 | 168.44 (19)  | O1—C2—C19—C17       | -179.25 (17) |
| C5—C11—C12—C14      | -69.3 (2)    | C3—C2—C19—C17       | 0.4 (3)      |
| C20—C11—C12—<br>C13 | -98.2 (2)    | C12—C11—C20—<br>C21 | 30.6 (3)     |
| C5—C11—C12—C13      | 24.1 (2)     | C5—C11—C20—C21      | -86.4 (2)    |
| C14—O4—C13—C12      | 3.29 (16)    | C12—C11—C20—<br>C25 | -151.1 (2)   |
| C14—O4—C13—C15      | -106.42 (18) | C5—C11—C20—C25      | 91.9 (2)     |
| C14—C12—C13—O4      | -2.96 (14)   | C25—C20—C21—<br>C22 | 0.6 (3)      |
| C11—C12—C13—O4      | -122.18 (18) | C11—C20—C21—<br>C22 | 179.0 (2)    |
| C14—C12—C13—<br>C15 | 111.09 (18)  | C20—C21—C22—<br>C23 | -0.8 (3)     |
| C11—C12—C13—        | -8.1 (2)     | C21—C22—C23—        | 0.4 (4)      |



|                |              |                     |            |
|----------------|--------------|---------------------|------------|
| C15            |              | C24                 |            |
| C13—O4—C14—O5  | 178.6 (2)    | C22—C23—C24—<br>C25 | 0.3 (4)    |
| C13—O4—C14—C12 | -3.32 (16)   | C23—C24—C25—<br>C20 | -0.5 (4)   |
| C13—C12—C14—O5 | -179.1 (3)   | C21—C20—C25—<br>C24 | 0.0 (3)    |
| C11—C12—C14—O5 | -71.5 (4)    | C11—C20—C25—<br>C24 | -178.4 (2) |
| C13—C12—C14—O4 | 3.23 (15)    | O3—C9—C26—C27       | 178.7 (2)  |
| C11—C12—C14—O4 | 110.8 (2)    | C8—C9—C26—C27       | -1.5 (3)   |
| O4—C13—C15—O6  | -152.74 (16) | C7—C6—C27—C26       | 1.1 (3)    |
| C12—C13—C15—O6 | 109.59 (19)  | C5—C6—C27—C26       | -179.3 (2) |
| O4—C13—C15—C16 | -20.6 (2)    | C9—C26—C27—C6       | 1.0 (3)    |

## References

Sheldrick, G. M. (1996). *SADABS*. University of Göttingen, Germany.

Sheldrick, G. M. (1997). *SHELXL97*. University of Göttingen, Germany.

Bruker (2006). *SAINTE*. Bruker Analytical X-ray Instruments Inc., Madison, Wisconsin, USA.

Bruker (2006). *APEX2*. Bruker Analytical X-ray Instruments Inc., Madison, Wisconsin, USA.

Dolmanov, O. V., *et al.* (2009). OLEX2: A complete structure solution, refinement and analysis program. *J. Appl. Cryst.* 42, 339-341 (2009).

## X-ray crystallographic data for (±)-10

Crystals of compound (±)-10 suitable for X-ray analysis were obtained by vapor diffusion from benzene/hexanes. Crystallographic data have been deposited with the Cambridge Crystallographic Data Centre (CCDC # 943263). Copies of the data can be obtained free of charge through application to the CCDC, 12 Union Road, Cambridge CB21EZ, UK (fax: (+44)- 1223-336-033; e-mail: deposit@ccdc.cam.ac.uk).

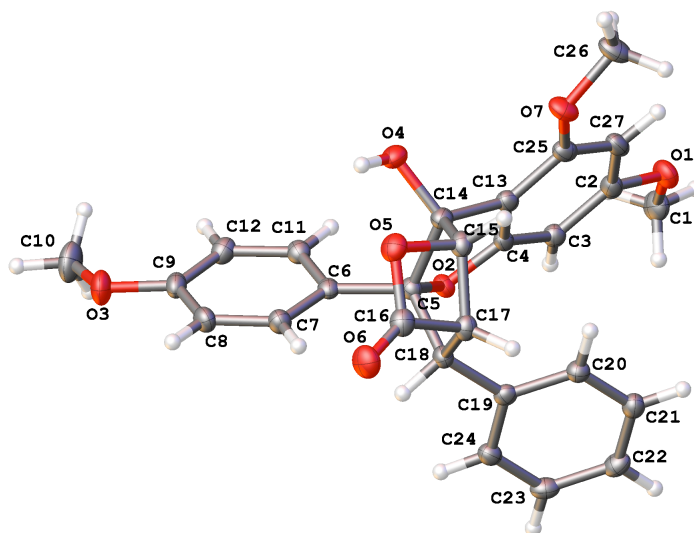

**Table SI-2.** Crystal data and structure refinement for  $\beta$ -lactone **10**.

Identification code **10**

### Crystal data

|                                 |                                                         |
|---------------------------------|---------------------------------------------------------|
| $C_{27}H_{24}O_7$               | $F(000) = 968$                                          |
| $M_r = 460.46$                  | $D_x = 1.378 \text{ Mg m}^{-3}$                         |
| Monoclinic, $P2_1/c$            | Cu $K\alpha$ radiation, $\lambda = 1.54178 \text{ \AA}$ |
| Hall symbol: $-P 2_1/c$         | Cell parameters from 9922 reflections                   |
| $a = 9.8122 (2) \text{ \AA}$    | $\theta = 4.5\text{--}66.5^\circ$                       |
| $b = 22.2466 (5) \text{ \AA}$   | $\mu = 0.82 \text{ mm}^{-1}$                            |
| $c = 10.2293 (2) \text{ \AA}$   | $T = 100 \text{ K}$                                     |
| $\beta = 96.410 (1)^\circ$      | Fragment, colorless                                     |
| $V = 2218.98 (8) \text{ \AA}^3$ | $0.13 \times 0.12 \times 0.05 \text{ mm}$               |
| $Z = 4$                         |                                                         |

### Data collection

|                                                                   |                                                                        |
|-------------------------------------------------------------------|------------------------------------------------------------------------|
| Bruker Proteum-R diffractometer                                   | 3856 independent reflections                                           |
| Radiation source: rotating anode                                  | 3657 reflections with $I > 2\sigma(I)$                                 |
| multilayer                                                        | $R_{\text{int}} = 0.043$                                               |
| $\omega$ & $\phi$ scans                                           | $\theta_{\text{max}} = 66.5^\circ$ , $\theta_{\text{min}} = 4.5^\circ$ |
| Absorption correction: multi-scan <i>SADABS</i> (Sheldrick, 1997) | $h = -11 \rightarrow 11$                                               |
| $T_{\text{min}} = 0.717$ , $T_{\text{max}} = 0.753$               | $k = -26 \rightarrow 26$                                               |
| 82996 measured reflections                                        | $l = -12 \rightarrow 12$                                               |

## Refinement

|                                 |                                                                                     |
|---------------------------------|-------------------------------------------------------------------------------------|
| Refinement on $F^2$             | Primary atom site location: structure-invariant direct methods                      |
| Least-squares matrix: full      | Secondary atom site location: difference Fourier map                                |
| $R[F^2 > 2\sigma(F^2)] = 0.035$ | Hydrogen site location: inferred from neighbouring sites                            |
| $wR(F^2) = 0.090$               | H atoms treated by a mixture of independent and constrained refinement              |
| $S = 1.05$                      | $w = 1/[\sigma^2(F_o^2) + (0.0397P)^2 + 1.2596P]$<br>where $P = (F_o^2 + 2F_c^2)/3$ |
| 3856 reflections                | $(\Delta/\sigma)_{\text{max}} = 0.001$                                              |
| 313 parameters                  | $\Delta_{\text{max}} = 0.31 \text{ e } \text{\AA}^{-3}$                             |
| 0 restraints                    | $\Delta_{\text{min}} = -0.19 \text{ e } \text{\AA}^{-3}$                            |

Data collection: *APEX2* (Bruker, 2006); cell refinement: *SAINTE* (Bruker, 2006); data reduction: *SAINTE* (Bruker, 2006); program(s) used to solve structure: *SHELXS97* (Sheldrick, 1990); program(s) used to refine structure: *SHELXL97* (Sheldrick, 1997); molecular graphics: *OLEX2* (Dolmanov, *et al.* 2009); software used to prepare material for publication: *publCIF* v.1.9.5\_c (IUCr).

## Special details

**Geometry.** All esds (except the esd in the dihedral angle between two l.s. planes) are estimated using the full covariance matrix. The cell esds are taken into account individually in the estimation of esds in distances, angles and torsion angles; correlations between esds in cell parameters are only used when they are defined by crystal symmetry. An approximate (isotropic) treatment of cell esds is used for estimating esds involving l.s. planes.

**Refinement.** Refinement of  $F^2$  against ALL reflections. The weighted R-factor  $wR$  and goodness of fit  $S$  are based on  $F^2$ , conventional R-factors  $R$  are based on  $F$ , with  $F$  set to zero for negative  $F^2$ . The threshold expression of  $F^2 > 2\sigma(F^2)$  is used only for calculating R-factors(gt) etc. and is not relevant to the choice of reflections for refinement. R-factors based on  $F^2$  are statistically about twice as large as those based on  $F$ , and R-factors based on ALL data will be even larger.

Fractional atomic coordinates and isotropic or equivalent isotropic displacement parameters ( $\text{\AA}^2$ )

|      | $x$           | $y$         | $z$          | $U_{iso}^*/U_{eq}$ |
|------|---------------|-------------|--------------|--------------------|
| O1   | -0.27620 (10) | 0.76182 (5) | 0.57089 (11) | 0.0291 (2)         |
| O2   | 0.11927 (9)   | 0.63543 (4) | 0.54357 (9)  | 0.0185 (2)         |
| O3   | 0.69823 (11)  | 0.54323 (5) | 0.78244 (11) | 0.0337 (3)         |
| O4   | 0.34782 (10)  | 0.74124 (4) | 0.51269 (10) | 0.0239 (2)         |
| H4   | 0.426 (2)     | 0.7327 (8)  | 0.4868 (18)  | 0.036*             |
| O5   | 0.42013 (10)  | 0.69939 (5) | 0.27409 (10) | 0.0264 (2)         |
| O6   | 0.46134 (11)  | 0.61648 (5) | 0.15070 (11) | 0.0327 (3)         |
| O7   | 0.11270 (11)  | 0.82930 (4) | 0.37440 (10) | 0.0270 (2)         |
| C1   | -0.33431 (15) | 0.72076 (7) | 0.65666 (16) | 0.0306 (3)         |
| H1A  | -0.3548       | 0.6826      | 0.6107       | 0.046*             |
| H1B  | -0.4190       | 0.7378      | 0.6834       | 0.046*             |
| H1C  | -0.2689       | 0.7137      | 0.7348       | 0.046*             |
| C2   | -0.15005 (14) | 0.74767 (6) | 0.53580 (14) | 0.0228 (3)         |
| C3   | -0.08570 (14) | 0.69292 (6) | 0.56362 (13) | 0.0200 (3)         |
| H3   | -0.1272       | 0.6617      | 0.6088       | 0.024*             |
| C4   | 0.04296 (13)  | 0.68651 (6) | 0.52130 (12) | 0.0180 (3)         |
| C5   | 0.23444 (13)  | 0.63931 (6) | 0.46545 (13) | 0.0177 (3)         |
| C6   | 0.35819 (13)  | 0.61362 (6) | 0.54968 (13) | 0.0184 (3)         |
| C7   | 0.46666 (14)  | 0.58547 (6) | 0.49665 (14) | 0.0224 (3)         |
| H7   | 0.4639        | 0.5815      | 0.4039       | 0.027*             |
| C8   | 0.57839 (15)  | 0.56323 (6) | 0.57700 (15) | 0.0252 (3)         |
| H8   | 0.6518        | 0.5448      | 0.5388       | 0.030*             |
| C9   | 0.58399 (14)  | 0.56768 (6) | 0.71253 (14) | 0.0242 (3)         |
| C10  | 0.69930 (18)  | 0.53957 (9) | 0.92184 (17) | 0.0417 (4)         |
| H10A | 0.6901        | 0.5800      | 0.9579       | 0.063*             |
| H10B | 0.7859        | 0.5217      | 0.9603       | 0.063*             |
| H10C | 0.6226        | 0.5145      | 0.9430       | 0.063*             |
| C11  | 0.36799 (14)  | 0.61960 (6) | 0.68601 (14) | 0.0209 (3)         |
| H11  | 0.2973        | 0.6401      | 0.7242       | 0.025*             |
| C12  | 0.47819 (14)  | 0.59642 (6) | 0.76791 (14) | 0.0239 (3)         |
| H12  | 0.4812        | 0.6002      | 0.8607       | 0.029*             |
| C13  | 0.10776 (14)  | 0.73034 (6) | 0.45574 (13) | 0.0196 (3)         |
| C14  | 0.24702 (14)  | 0.70884 (6) | 0.43075 (13) | 0.0198 (3)         |
| C15  | 0.27253 (14)  | 0.71124 (6) | 0.28775 (14) | 0.0219 (3)         |
| H15  | 0.2329        | 0.7471      | 0.2383       | 0.026*             |
| C16  | 0.38555 (15)  | 0.64817 (7) | 0.20261 (14) | 0.0247 (3)         |
| C17  | 0.23484 (14)  | 0.65082 (6) | 0.22251 (13) | 0.0216 (3)         |
| H17  | 0.1697        | 0.6528      | 0.1401       | 0.026*             |

|      |               |             |              |            |
|------|---------------|-------------|--------------|------------|
| C18  | 0.19398 (14)  | 0.60678 (6) | 0.32908 (13) | 0.0190 (3) |
| H18  | 0.2517        | 0.5698      | 0.3267       | 0.023*     |
| C19  | 0.04449 (14)  | 0.58796 (6) | 0.30718 (12) | 0.0187 (3) |
| C20  | -0.05966 (14) | 0.62704 (6) | 0.25680 (13) | 0.0205 (3) |
| H20  | -0.0369       | 0.6667      | 0.2322       | 0.025*     |
| C21  | -0.19596 (15) | 0.60896 (6) | 0.24212 (14) | 0.0234 (3) |
| H21  | -0.2656       | 0.6361      | 0.2073       | 0.028*     |
| C22  | -0.23058 (15) | 0.55124 (6) | 0.27841 (14) | 0.0241 (3) |
| H22  | -0.3237       | 0.5387      | 0.2686       | 0.029*     |
| C23  | -0.12823 (15) | 0.51215 (6) | 0.32902 (14) | 0.0242 (3) |
| H23  | -0.1515       | 0.4728      | 0.3551       | 0.029*     |
| C24  | 0.00822 (14)  | 0.53005 (6) | 0.34198 (13) | 0.0216 (3) |
| H24  | 0.0776        | 0.5025      | 0.3750       | 0.026*     |
| C25  | 0.04133 (15)  | 0.78576 (6) | 0.43163 (13) | 0.0216 (3) |
| C26  | 0.05541 (18)  | 0.88866 (6) | 0.36907 (16) | 0.0331 (4) |
| H26A | -0.0296       | 0.8890      | 0.3089       | 0.050*     |
| H26B | 0.1211        | 0.9169      | 0.3375       | 0.050*     |
| H26C | 0.0356        | 0.9007      | 0.4572       | 0.050*     |
| C27  | -0.08828 (15) | 0.79374 (6) | 0.46977 (14) | 0.0241 (3) |
| H27  | -0.1356       | 0.8305      | 0.4512       | 0.029*     |

Atomic displacement parameters ( $\text{\AA}^2$ )

|    | $U^{11}$   | $U^{22}$   | $U^{33}$   | $U^{12}$    | $U^{13}$    | $U^{23}$    |
|----|------------|------------|------------|-------------|-------------|-------------|
| O1 | 0.0233 (5) | 0.0274 (5) | 0.0374 (6) | 0.0083 (4)  | 0.0062 (4)  | -0.0026 (4) |
| O2 | 0.0177 (5) | 0.0166 (4) | 0.0219 (5) | 0.0024 (4)  | 0.0045 (4)  | 0.0024 (4)  |
| O3 | 0.0249 (6) | 0.0413 (6) | 0.0330 (6) | 0.0088 (5)  | -0.0056 (5) | 0.0062 (5)  |
| O4 | 0.0225 (5) | 0.0218 (5) | 0.0267 (5) | -0.0044 (4) | 0.0002 (4)  | -0.0013 (4) |
| O5 | 0.0202 (5) | 0.0299 (5) | 0.0295 (5) | -0.0036 (4) | 0.0048 (4)  | 0.0022 (4)  |
| O6 | 0.0249 (5) | 0.0389 (6) | 0.0359 (6) | 0.0057 (5)  | 0.0098 (5)  | -0.0003 (5) |
| O7 | 0.0366 (6) | 0.0157 (5) | 0.0293 (5) | 0.0022 (4)  | 0.0067 (4)  | 0.0042 (4)  |
| C1 | 0.0201 (7) | 0.0346 (8) | 0.0379 (8) | 0.0035 (6)  | 0.0062 (6)  | -0.0024 (7) |
| C2 | 0.0205 (7) | 0.0249 (7) | 0.0226 (7) | 0.0046 (6)  | 0.0001 (5)  | -0.0060 (6) |
| C3 | 0.0201 (7) | 0.0204 (7) | 0.0194 (6) | 0.0009 (5)  | 0.0018 (5)  | -0.0011 (5) |
| C4 | 0.0202 (7) | 0.0160 (6) | 0.0168 (6) | 0.0028 (5)  | -0.0018 (5) | -0.0014 (5) |
| C5 | 0.0157 (6) | 0.0179 (7) | 0.0200 (7) | 0.0004 (5)  | 0.0036 (5)  | 0.0005 (5)  |
| C6 | 0.0168 (7) | 0.0145 (6) | 0.0236 (7) | -0.0017 (5) | 0.0008 (5)  | 0.0017 (5)  |
| C7 | 0.0220 (7) | 0.0221 (7) | 0.0228 (7) | 0.0028 (5)  | 0.0010 (6)  | -0.0007 (5) |
| C8 | 0.0199 (7) | 0.0233 (7) | 0.0321 (8) | 0.0048 (6)  | 0.0014 (6)  | -0.0021 (6) |

|     |             |             |            |             |             |             |
|-----|-------------|-------------|------------|-------------|-------------|-------------|
| C9  | 0.0193 (7)  | 0.0212 (7)  | 0.0305 (8) | -0.0002 (5) | -0.0045 (6) | 0.0048 (6)  |
| C10 | 0.0318 (9)  | 0.0569 (11) | 0.0337 (9) | 0.0039 (8)  | -0.0078 (7) | 0.0151 (8)  |
| C11 | 0.0185 (7)  | 0.0198 (7)  | 0.0245 (7) | -0.0015 (5) | 0.0031 (5)  | 0.0013 (5)  |
| C12 | 0.0219 (7)  | 0.0268 (7)  | 0.0225 (7) | -0.0031 (6) | 0.0000 (6)  | 0.0030 (6)  |
| C13 | 0.0219 (7)  | 0.0185 (7)  | 0.0182 (6) | 0.0008 (5)  | 0.0005 (5)  | -0.0016 (5) |
| C14 | 0.0207 (7)  | 0.0163 (6)  | 0.0220 (7) | -0.0011 (5) | 0.0000 (5)  | 0.0013 (5)  |
| C15 | 0.0173 (7)  | 0.0229 (7)  | 0.0256 (7) | -0.0001 (5) | 0.0030 (5)  | 0.0038 (6)  |
| C16 | 0.0227 (7)  | 0.0272 (7)  | 0.0246 (7) | 0.0001 (6)  | 0.0042 (6)  | 0.0046 (6)  |
| C17 | 0.0189 (7)  | 0.0255 (7)  | 0.0204 (7) | 0.0014 (5)  | 0.0025 (5)  | 0.0008 (5)  |
| C18 | 0.0175 (7)  | 0.0177 (6)  | 0.0216 (7) | 0.0018 (5)  | 0.0009 (5)  | 0.0005 (5)  |
| C19 | 0.0200 (7)  | 0.0193 (7)  | 0.0167 (6) | -0.0007 (5) | 0.0022 (5)  | -0.0027 (5) |
| C20 | 0.0211 (7)  | 0.0184 (6)  | 0.0219 (7) | -0.0009 (5) | 0.0015 (5)  | 0.0002 (5)  |
| C21 | 0.0207 (7)  | 0.0248 (7)  | 0.0242 (7) | 0.0021 (6)  | 0.0002 (6)  | -0.0018 (6) |
| C22 | 0.0196 (7)  | 0.0280 (7)  | 0.0251 (7) | -0.0055 (6) | 0.0043 (6)  | -0.0047 (6) |
| C23 | 0.0290 (8)  | 0.0193 (7)  | 0.0246 (7) | -0.0062 (6) | 0.0051 (6)  | -0.0023 (5) |
| C24 | 0.0243 (7)  | 0.0182 (7)  | 0.0220 (7) | 0.0015 (5)  | 0.0014 (6)  | -0.0009 (5) |
| C25 | 0.0286 (7)  | 0.0176 (7)  | 0.0179 (6) | 0.0005 (6)  | -0.0006 (5) | -0.0003 (5) |
| C26 | 0.0489 (10) | 0.0173 (7)  | 0.0335 (8) | 0.0054 (7)  | 0.0064 (7)  | 0.0040 (6)  |
| C27 | 0.0296 (8)  | 0.0185 (7)  | 0.0231 (7) | 0.0072 (6)  | -0.0016 (6) | -0.0019 (5) |

Geometric parameters (Å, °)

|        |             |          |             |
|--------|-------------|----------|-------------|
| O1—C2  | 1.3635 (17) | C10—H10B | 0.9800      |
| O1—C1  | 1.4285 (19) | C10—H10C | 0.9800      |
| O2—C4  | 1.3660 (16) | C11—C12  | 1.391 (2)   |
| O2—C5  | 1.4576 (15) | C11—H11  | 0.9500      |
| O3—C9  | 1.3729 (17) | C12—H12  | 0.9500      |
| O3—C10 | 1.427 (2)   | C13—C25  | 1.4037 (19) |
| O4—C14 | 1.4197 (16) | C13—C14  | 1.4963 (19) |
| O4—H4  | 0.86 (2)    | C14—C15  | 1.5124 (19) |
| O5—C16 | 1.3758 (18) | C15—C17  | 1.5277 (19) |
| O5—C15 | 1.4939 (16) | C15—H15  | 1.0000      |
| O6—C16 | 1.1917 (18) | C16—C17  | 1.5162 (19) |
| O7—C25 | 1.3649 (17) | C17—C18  | 1.5513 (18) |
| O7—C26 | 1.4337 (17) | C17—H17  | 1.0000      |
| C1—H1A | 0.9800      | C18—C19  | 1.5178 (18) |
| C1—H1B | 0.9800      | C18—H18  | 1.0000      |
| C1—H1C | 0.9800      | C19—C24  | 1.3934 (19) |
| C2—C3  | 1.387 (2)   | C19—C20  | 1.3959 (19) |

|            |             |             |             |
|------------|-------------|-------------|-------------|
| C2—C27     | 1.402 (2)   | C20—C21     | 1.389 (2)   |
| C3—C4      | 1.3870 (19) | C20—H20     | 0.9500      |
| C3—H3      | 0.9500      | C21—C22     | 1.389 (2)   |
| C4—C13     | 1.3783 (19) | C21—H21     | 0.9500      |
| C5—C6      | 1.5198 (18) | C22—C23     | 1.385 (2)   |
| C5—C18     | 1.5822 (18) | C22—H22     | 0.9500      |
| C5—C14     | 1.5948 (18) | C23—C24     | 1.389 (2)   |
| C6—C11     | 1.394 (2)   | C23—H23     | 0.9500      |
| C6—C7      | 1.3957 (19) | C24—H24     | 0.9500      |
| C7—C8      | 1.386 (2)   | C25—C27     | 1.383 (2)   |
| C7—H7      | 0.9500      | C26—H26A    | 0.9800      |
| C8—C9      | 1.385 (2)   | C26—H26B    | 0.9800      |
| C8—H8      | 0.9500      | C26—H26C    | 0.9800      |
| C9—C12     | 1.392 (2)   | C27—H27     | 0.9500      |
| C10—H10A   | 0.9800      |             |             |
|            |             |             |             |
| C2—O1—C1   | 116.77 (11) | C13—C14—C15 | 114.00 (11) |
| C4—O2—C5   | 107.66 (9)  | O4—C14—C5   | 115.29 (11) |
| C9—O3—C10  | 117.23 (12) | C13—C14—C5  | 100.20 (10) |
| C14—O4—H4  | 107.1 (12)  | C15—C14—C5  | 105.96 (10) |
| C16—O5—C15 | 90.68 (10)  | O5—C15—C14  | 110.55 (11) |
| C25—O7—C26 | 116.88 (11) | O5—C15—C17  | 89.64 (10)  |
| O1—C1—H1A  | 109.5       | C14—C15—C17 | 109.46 (11) |
| O1—C1—H1B  | 109.5       | O5—C15—H15  | 114.8       |
| H1A—C1—H1B | 109.5       | C14—C15—H15 | 114.8       |
| O1—C1—H1C  | 109.5       | C17—C15—H15 | 114.8       |
| H1A—C1—H1C | 109.5       | O6—C16—O5   | 126.70 (13) |
| H1B—C1—H1C | 109.5       | O6—C16—C17  | 138.54 (14) |
| O1—C2—C3   | 123.68 (13) | O5—C16—C17  | 94.75 (11)  |
| O1—C2—C27  | 114.34 (12) | C16—C17—C15 | 84.30 (10)  |
| C3—C2—C27  | 121.97 (13) | C16—C17—C18 | 113.72 (11) |
| C2—C3—C4   | 115.83 (13) | C15—C17—C18 | 108.52 (11) |
| C2—C3—H3   | 122.1       | C16—C17—H17 | 115.4       |
| C4—C3—H3   | 122.1       | C15—C17—H17 | 115.4       |
| O2—C4—C13  | 113.30 (11) | C18—C17—H17 | 115.4       |
| O2—C4—C3   | 122.31 (12) | C19—C18—C17 | 113.07 (11) |
| C13—C4—C3  | 124.38 (12) | C19—C18—C5  | 113.55 (10) |
| O2—C5—C6   | 106.63 (10) | C17—C18—C5  | 105.76 (10) |
| O2—C5—C18  | 108.83 (10) | C19—C18—H18 | 108.1       |

|               |              |                |             |
|---------------|--------------|----------------|-------------|
| C6—C5—C18     | 115.71 (10)  | C17—C18—H18    | 108.1       |
| O2—C5—C14     | 105.27 (10)  | C5—C18—H18     | 108.1       |
| C6—C5—C14     | 114.46 (11)  | C24—C19—C20    | 118.22 (12) |
| C18—C5—C14    | 105.39 (10)  | C24—C19—C18    | 119.19 (12) |
| C11—C6—C7     | 117.47 (12)  | C20—C19—C18    | 122.56 (12) |
| C11—C6—C5     | 119.53 (12)  | C21—C20—C19    | 121.06 (13) |
| C7—C6—C5      | 122.96 (12)  | C21—C20—H20    | 119.5       |
| C8—C7—C6      | 121.11 (13)  | C19—C20—H20    | 119.5       |
| C8—C7—H7      | 119.4        | C20—C21—C22    | 120.01 (13) |
| C6—C7—H7      | 119.4        | C20—C21—H21    | 120.0       |
| C9—C8—C7      | 120.56 (13)  | C22—C21—H21    | 120.0       |
| C9—C8—H8      | 119.7        | C23—C22—C21    | 119.46 (13) |
| C7—C8—H8      | 119.7        | C23—C22—H22    | 120.3       |
| O3—C9—C8      | 115.59 (13)  | C21—C22—H22    | 120.3       |
| O3—C9—C12     | 124.93 (13)  | C22—C23—C24    | 120.45 (13) |
| C8—C9—C12     | 119.48 (13)  | C22—C23—H23    | 119.8       |
| O3—C10—H10A   | 109.5        | C24—C23—H23    | 119.8       |
| O3—C10—H10B   | 109.5        | C23—C24—C19    | 120.78 (13) |
| H10A—C10—H10B | 109.5        | C23—C24—H24    | 119.6       |
| O3—C10—H10C   | 109.5        | C19—C24—H24    | 119.6       |
| H10A—C10—H10C | 109.5        | O7—C25—C27     | 124.20 (12) |
| H10B—C10—H10C | 109.5        | O7—C25—C13     | 116.63 (12) |
| C12—C11—C6    | 121.97 (13)  | C27—C25—C13    | 119.14 (13) |
| C12—C11—H11   | 119.0        | O7—C26—H26A    | 109.5       |
| C6—C11—H11    | 119.0        | O7—C26—H26B    | 109.5       |
| C11—C12—C9    | 119.34 (13)  | H26A—C26—H26B  | 109.5       |
| C11—C12—H12   | 120.3        | O7—C26—H26C    | 109.5       |
| C9—C12—H12    | 120.3        | H26A—C26—H26C  | 109.5       |
| C4—C13—C25    | 118.45 (13)  | H26B—C26—H26C  | 109.5       |
| C4—C13—C14    | 109.67 (11)  | C25—C27—C2     | 120.19 (13) |
| C25—C13—C14   | 131.74 (12)  | C25—C27—H27    | 119.9       |
| O4—C14—C13    | 109.04 (11)  | C2—C27—H27     | 119.9       |
| O4—C14—C15    | 111.93 (11)  |                |             |
|               |              |                |             |
| C1—O1—C2—C3   | 9.1 (2)      | C16—O5—C15—C17 | 6.15 (10)   |
| C1—O1—C2—C27  | -170.10 (12) | O4—C14—C15—O5  | 45.85 (14)  |
| O1—C2—C3—C4   | -179.54 (12) | C13—C14—C15—O5 | 170.19 (11) |
| C27—C2—C3—C4  | -0.4 (2)     | C5—C14—C15—O5  | -80.60 (13) |
| C5—O2—C4—C13  | -11.81 (14)  | O4—C14—C15—C17 | 143.05 (11) |



|                |              |                     |              |
|----------------|--------------|---------------------|--------------|
| C5—O2—C4—C3    | 169.29 (12)  | C13—C14—C15—<br>C17 | -92.61 (13)  |
| C2—C3—C4—O2    | 178.97 (12)  | C5—C14—C15—C17      | 16.60 (14)   |
| C2—C3—C4—C13   | 0.2 (2)      | C15—O5—C16—O6       | 175.10 (15)  |
| C4—O2—C5—C6    | 140.94 (10)  | C15—O5—C16—C17      | -6.22 (10)   |
| C4—O2—C5—C18   | -93.60 (11)  | O6—C16—C17—C15      | -175.49 (19) |
| C4—O2—C5—C14   | 18.97 (13)   | O5—C16—C17—C15      | 6.11 (10)    |
| O2—C5—C6—C11   | -31.22 (15)  | O6—C16—C17—C18      | 76.8 (2)     |
| C18—C5—C6—C11  | -152.39 (12) | O5—C16—C17—C18      | -101.64 (12) |
| C14—C5—C6—C11  | 84.75 (15)   | O5—C15—C17—C16      | -5.61 (9)    |
| O2—C5—C6—C7    | 150.88 (12)  | C14—C15—C17—<br>C16 | -117.34 (12) |
| C18—C5—C6—C7   | 29.71 (18)   | O5—C15—C17—C18      | 107.52 (11)  |
| C14—C5—C6—C7   | -93.15 (15)  | C14—C15—C17—<br>C18 | -4.20 (15)   |
| C11—C6—C7—C8   | 1.3 (2)      | C16—C17—C18—<br>C19 | -153.34 (12) |
| C5—C6—C7—C8    | 179.28 (12)  | C15—C17—C18—<br>C19 | 114.78 (12)  |
| C6—C7—C8—C9    | 0.9 (2)      | C16—C17—C18—C5      | 81.81 (13)   |
| C10—O3—C9—C8   | -171.71 (14) | C15—C17—C18—C5      | -10.07 (14)  |
| C10—O3—C9—C12  | 9.2 (2)      | O2—C5—C18—C19       | 7.66 (14)    |
| C7—C8—C9—O3    | 178.91 (13)  | C6—C5—C18—C19       | 127.63 (12)  |
| C7—C8—C9—C12   | -2.0 (2)     | C14—C5—C18—C19      | -104.83 (12) |
| C7—C6—C11—C12  | -2.7 (2)     | O2—C5—C18—C17       | 132.21 (10)  |
| C5—C6—C11—C12  | 179.32 (12)  | C6—C5—C18—C17       | -107.81 (12) |
| C6—C11—C12—C9  | 1.7 (2)      | C14—C5—C18—C17      | 19.72 (13)   |
| O3—C9—C12—C11  | 179.70 (13)  | C17—C18—C19—<br>C24 | 145.99 (12)  |
| C8—C9—C12—C11  | 0.7 (2)      | C5—C18—C19—C24      | -93.50 (14)  |
| O2—C4—C13—C25  | -177.66 (11) | C17—C18—C19—<br>C20 | -35.94 (17)  |
| C3—C4—C13—C25  | 1.2 (2)      | C5—C18—C19—C20      | 84.57 (15)   |
| O2—C4—C13—C14  | -1.34 (15)   | C24—C19—C20—<br>C21 | 0.3 (2)      |
| C3—C4—C13—C14  | 177.53 (12)  | C18—C19—C20—<br>C21 | -177.82 (12) |
| C4—C13—C14—O4  | -109.08 (12) | C19—C20—C21—<br>C22 | 0.3 (2)      |
| C25—C13—C14—O4 | 66.59 (18)   | C20—C21—C22—<br>C23 | 0.0 (2)      |
| C4—C13—C14—C15 | 125.05 (12)  | C21—C22—C23—<br>C24 | -0.8 (2)     |

|                     |              |                     |              |
|---------------------|--------------|---------------------|--------------|
| C25—C13—C14—<br>C15 | -59.29 (19)  | C22—C23—C24—<br>C19 | 1.4 (2)      |
| C4—C13—C14—C5       | 12.34 (14)   | C20—C19—C24—<br>C23 | -1.14 (19)   |
| C25—C13—C14—C5      | -171.99 (14) | C18—C19—C24—<br>C23 | 177.01 (12)  |
| O2—C5—C14—O4        | 98.28 (12)   | C26—O7—C25—C27      | 7.9 (2)      |
| C6—C5—C14—O4        | -18.48 (16)  | C26—O7—C25—C13      | -170.10 (13) |
| C18—C5—C14—O4       | -146.75 (11) | C4—C13—C25—O7       | 175.74 (12)  |
| O2—C5—C14—C13       | -18.57 (12)  | C14—C13—C25—O7      | 0.4 (2)      |
| C6—C5—C14—C13       | -135.32 (11) | C4—C13—C25—C27      | -2.41 (19)   |
| C18—C5—C14—C13      | 96.40 (11)   | C14—C13—C25—<br>C27 | -177.77 (14) |
| O2—C5—C14—C15       | -137.35 (10) | O7—C25—C27—C2       | -175.76 (13) |
| C6—C5—C14—C15       | 105.90 (12)  | C13—C25—C27—C2      | 2.2 (2)      |
| C18—C5—C14—C15      | -22.38 (13)  | O1—C2—C27—C25       | 178.38 (12)  |
| C16—O5—C15—C14      | 116.86 (12)  | C3—C2—C27—C25       | -0.8 (2)     |

## References

Sheldrick, G. M. (1996). *SADABS*. University of Göttingen, Germany.

Sheldrick, G. M. (1997). *SHELXL97*. University of Göttingen, Germany.

Bruker (2006). *SAINTE*. Bruker Analytical X-ray Instruments Inc., Madison, Wisconsin, USA.

Bruker (2006). *APEX2*. Bruker Analytical X-ray Instruments Inc., Madison, Wisconsin, USA.

Dolmanov, O. V., *et al.* (2009). OLEX2: A complete structure solution, refinement and analysis program. *J. Appl. Cryst.* 42, 339-341 (2009).

## C. Selected Spectra

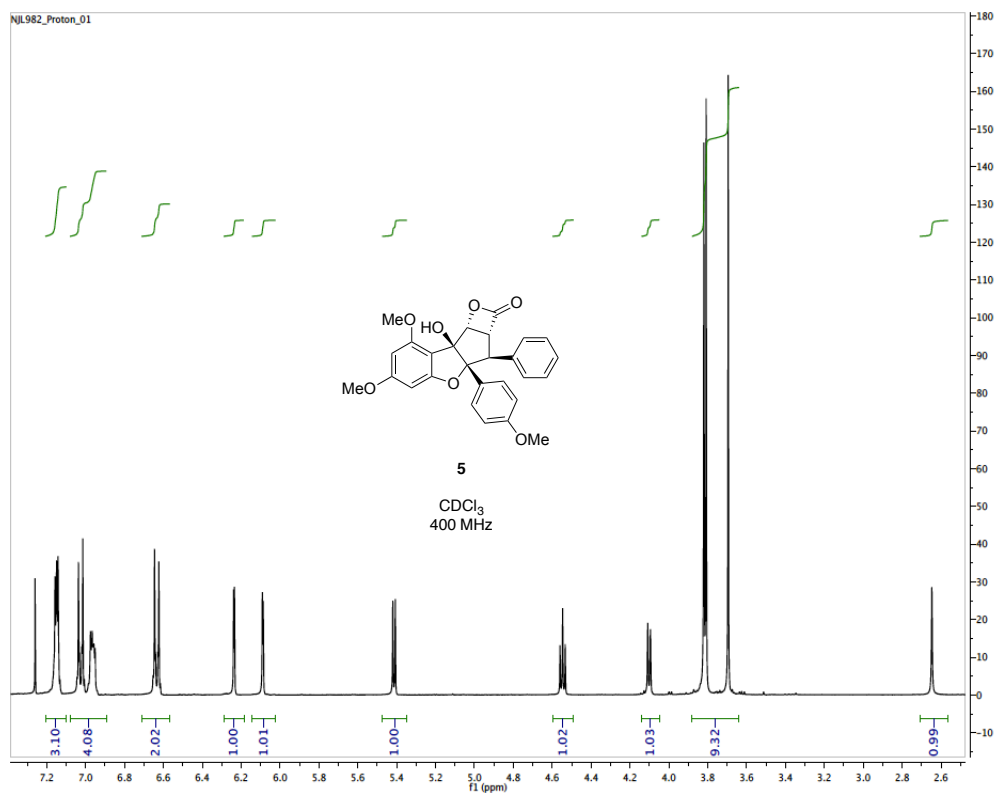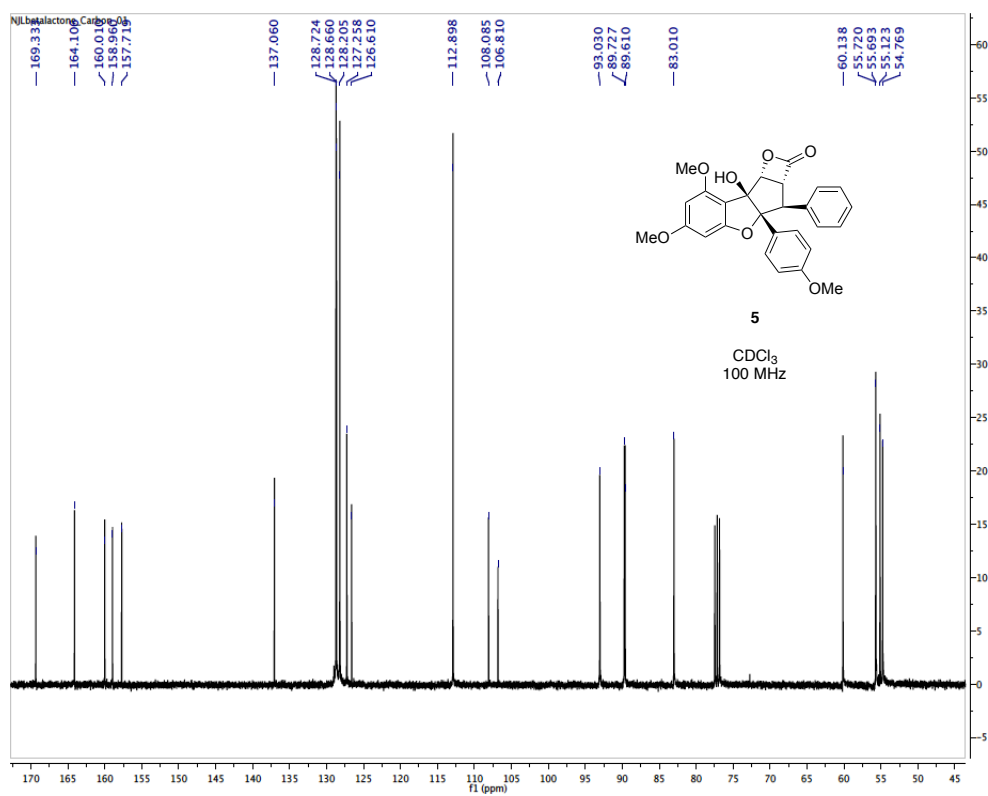

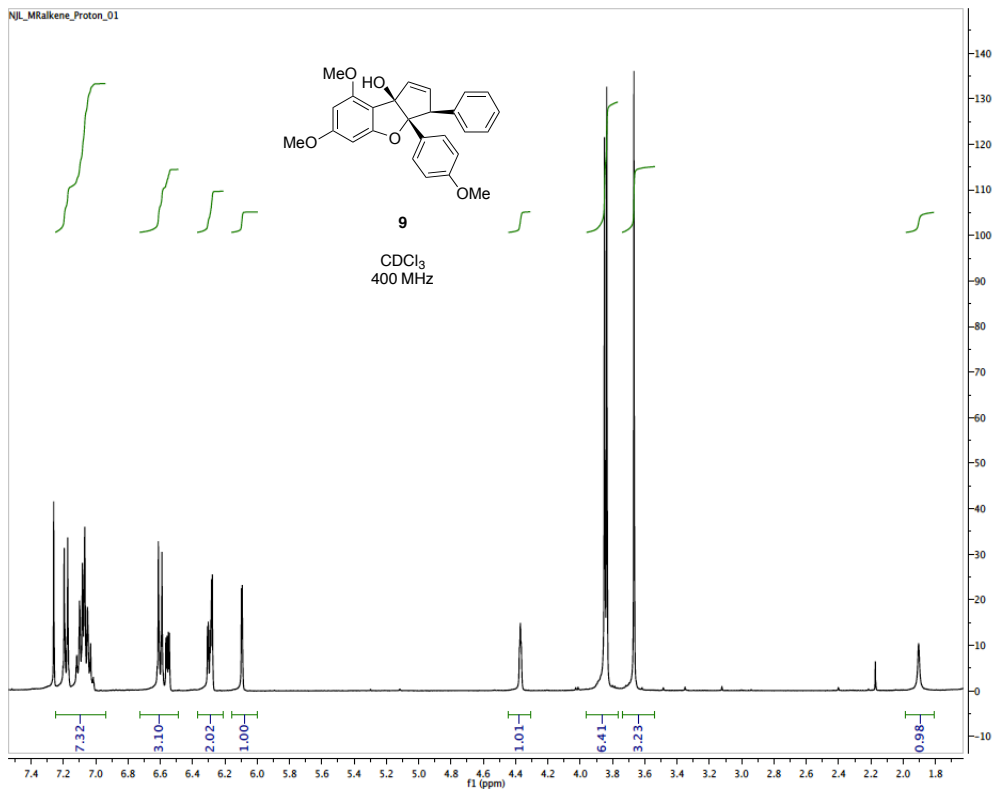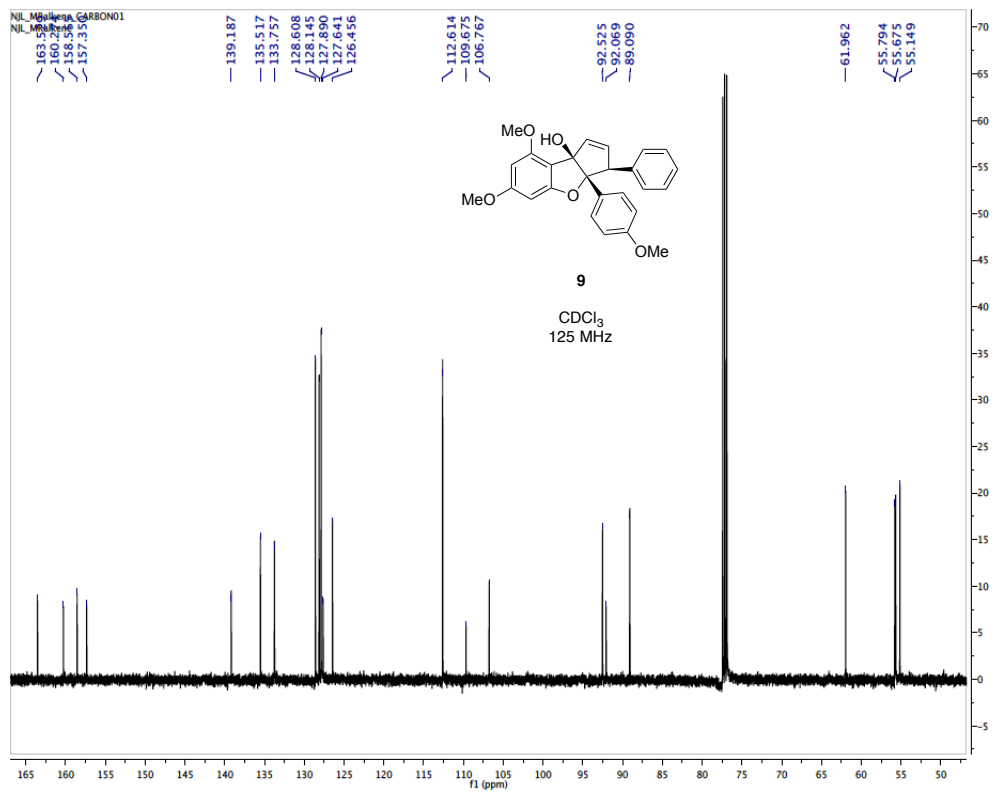

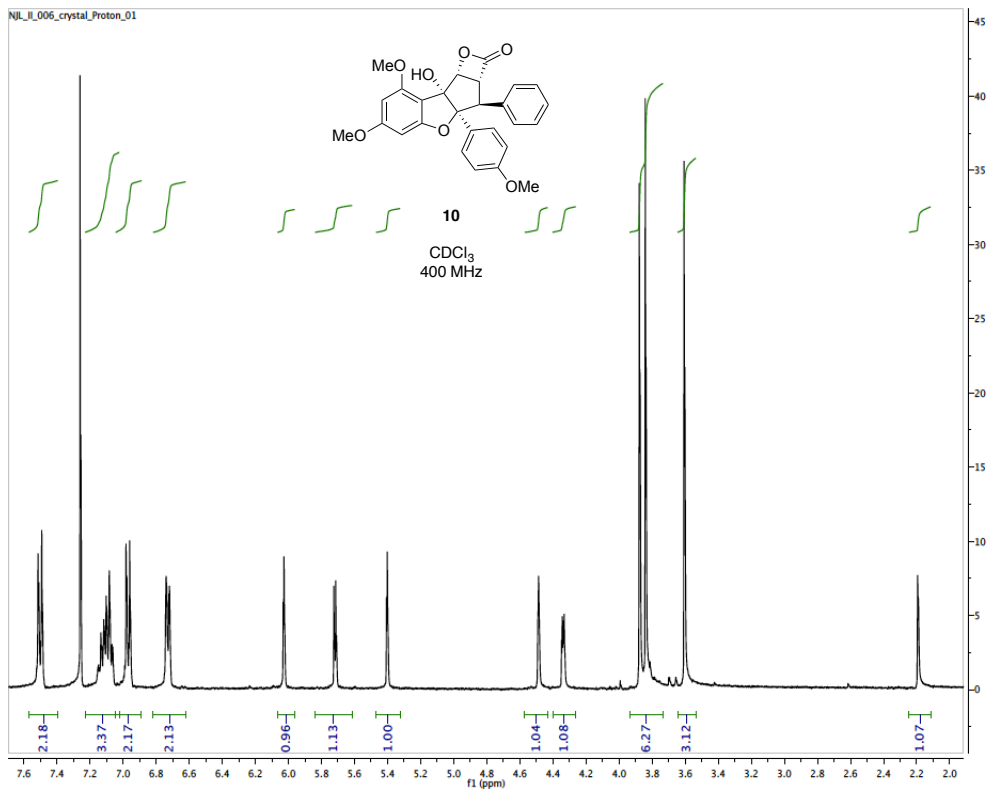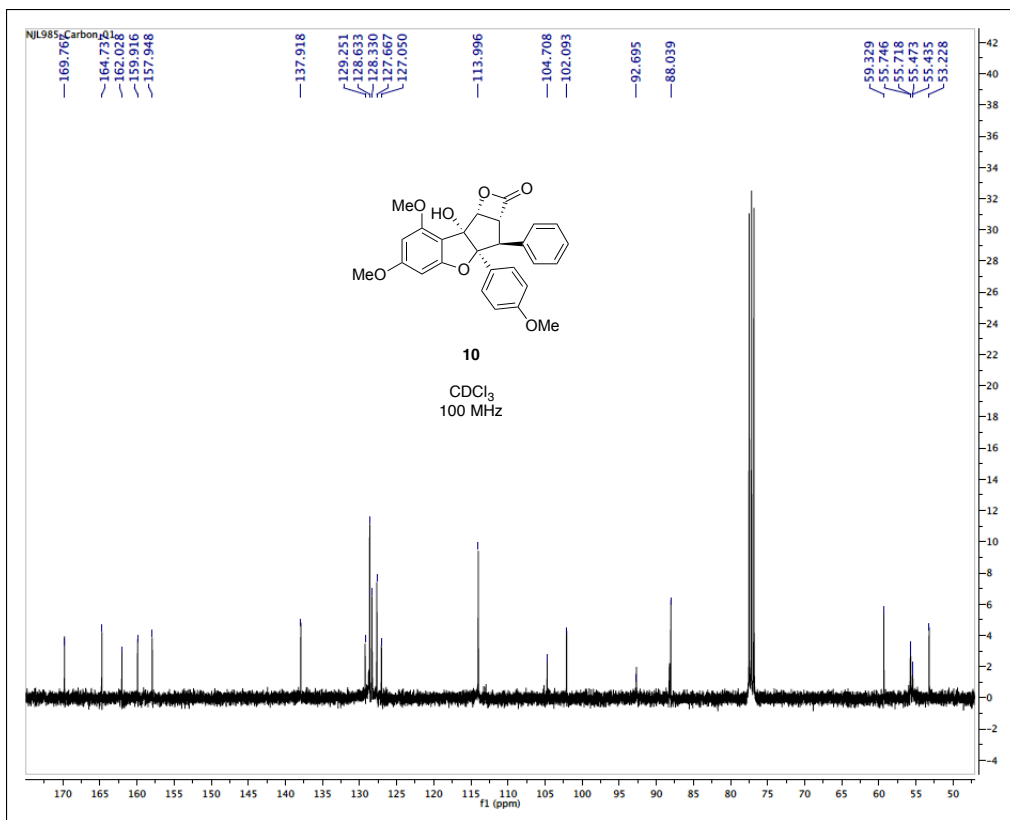

### III. ACTIVITY-BASED PROTEIN PROFILING

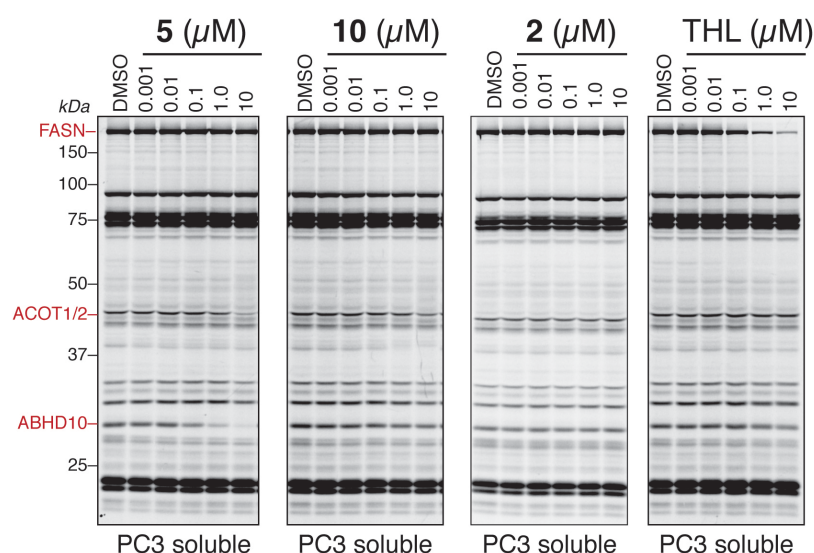

**Supplementary Figure 1.** *In vitro* gel-based competitive ABPP of  $\beta$ -lactone ( $\pm$ )-**5**, ( $\pm$ )-**10**, ( $\pm$ )-**2** and tetrahydrolipstatin (THL). The soluble fraction of PC3 cell lysates were treated with DMSO or compound (0.001–10  $\mu$ M) for 30 min followed by FP-Rh (30 min). Gel profiles show distinct targets for each inhibitor. Notably, ACOT1/2 and ABHD10, two primary targets of **5**, are not significantly inhibited by **10** (the di-*epi* isomer of **5**), ( $\pm$ )-**2** or THL.

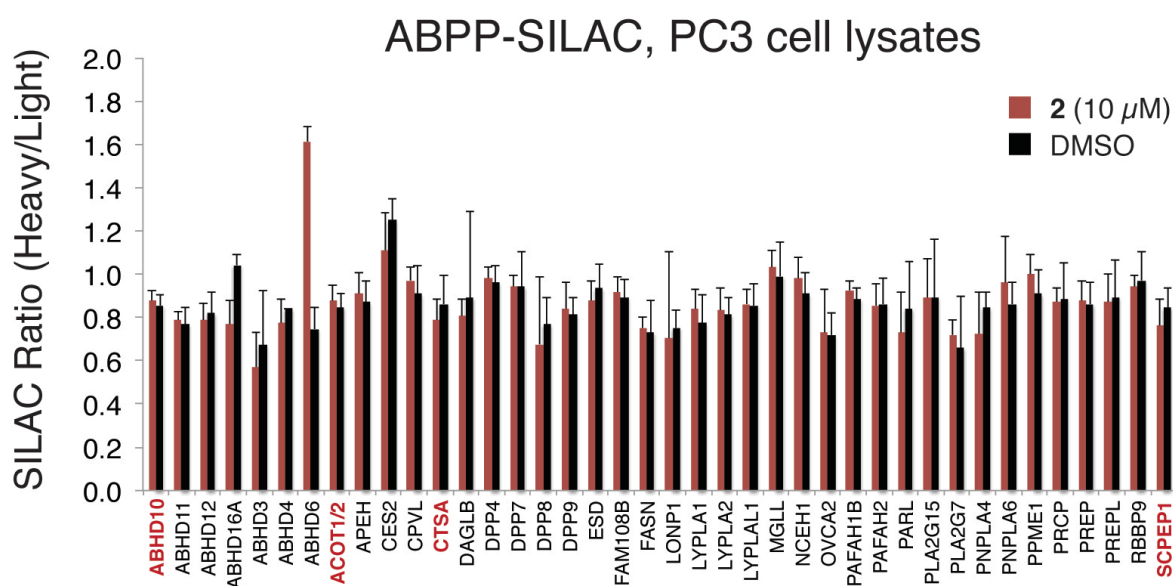

**Supplementary Figure 2.** ABPP-SILAC analysis of ( $\pm$ )-**2** (10  $\mu$ M) and DMSO (heavy amino acid-labeled proteome) versus DMSO (light amino acid-labeled proteome) in PC3 cell proteomes for all quantifiable serine hydrolases. Data are presented as the mean  $\pm$  standard deviations of heavy/light ratios for multiple unique peptides from each enzyme. The primary targets of ( $\pm$ )-**5** are shown in red.

**Cell and Tissue Proteome Preparation.** Tissue proteomes from mouse organs were homogenized in DPBS (Corning Cellgro) using the NextAdvance BBX24B Bullet Blender and the appropriate tissue-specific protocol (<http://www.nextadvance.com/api/index.cfm/products.info/c/421/Bullet-Blender#/Protocols>). Immediately after homogenization, samples were centrifuged at 3,000 g for 4 minutes at 4 °C to remove beads and insoluble debris. Cell proteomes were prepared from PC3 cells grown in RPMI-1640 media (Caisson Labs) with 10% FBS (Omega Scientific, Inc.). Cells were harvested with a cell scraper and washed 2x with DPBS then lysed using probe sonication with the Branson Sonifier 250. Membrane and soluble cell and tissue fractions were prepared by ultracentrifugation (100,000 g, 45 min). Membrane pellets were resuspended in DPBS by probe sonication. The DC Protein Assay from Bio-Rad was then used to measure proteome concentrations and proteomes were diluted in DPBS to 1.0 mg/mL total protein concentration for ABPP experiments.

***In Vitro* Competitive Activity-Based Protein Profiling.** Cell and tissue proteomes (50 µL, 1 mg/mL) were treated with inhibitors (1 µL in DMSO) or DMSO (1 µL) and incubated for 30 minutes at 37 °C. FP-Rh<sup>S3</sup> (1 µL, 50 µM in DMSO) was then added to each proteome and incubated for another 30 minutes at room temperature. Samples were then quenched with 4X SDS Loading Buffer (17 µL) and proteins were resolved by SDS-PAGE (10% Acrylamide Gels made in-house). Serine hydrolase activity was determined after fluorescent gel imaging on a Hitachi FMBio II by quantifying the fluorescence intensity of target gel bands using ImageJ 1.45s.

***In Situ* Cell Labeling.** PC3 cells were grown in 6 cm dishes in RPMI-1640 media (10% FBS). When cells reached confluency, the media was removed and replaced with serum-free RPMI-1640 (3 mL) containing either DMSO (0.2%) or inhibitor (1-10,000 nM, 0.2% DMSO). The cells were incubated for 2 hours at 37 °C before the media was removed and the cells were washed (DPBS, 2 x 3 mL), harvested, and lysed with a probe sonicator. The soluble fraction was obtained by ultracentrifugation (100,000 g, 45 min). A portion of each sample (50 µL, 1 mg/mL) was then treated with FP-Rhodamine and analyzed by SDS-PAGE as described above.

***In Vitro* Competitive SILAC-ABPP.** SILAC-ABPP experiments and analysis were performed as described before.<sup>S4-S7</sup> Briefly, cell pellets from ‘heavy’ and ‘light’ labeled cells were lysed in DPBS using probe

---

<sup>S3</sup> Patricelli, M. P.; Giang, D. K.; Stamp, L. M.; Burbaum, J. J. *Proteomics* **2001**, *1*, 1067–1071.

<sup>S4</sup> Adibekian, A.; Martin, B. R.; Wang, C.; Hsu, K. -L.; Bachovchin, D. A.; Niessen, S.; Hoover, H.; Cravatt, B. F. *Nat. Chem.* **2009**, *1*, 103–111.

sonication, and protein concentration was determined using the DC Assay. Heavy and light protein samples (500  $\mu$ L, 2 mg/mL) were incubated separately at 37 °C for 30 minutes with inhibitor (1  $\mu$ L in DMSO) or DMSO (1  $\mu$ L), respectively. The samples were then incubated with FP-Biotin<sup>S3</sup> (500  $\mu$ M, 1  $\mu$ L) for 60 minutes at room temperature and then quenched by combining them into a methanol:chloroform mixture (4:1, 2.5 mL). The FP-labeled proteins were enriched, trypsin-digested and the tryptic peptides resolved by two-dimensional liquid chromatography using strong cation exchange and C18 resins and analyzed by tandem MS using an Agilent 1100-series quaternary pump and Thermo Scientific LTQ Orbitrap ion trap mass spectrometer. MS2 data were searched using the ProLuCID algorithm (<http://fields.scripps.edu/downloads.php>) against a UniProt human protein sequence database concatenated with a reverse decoy database for false positive assessment. Heavy and light peptides identified from the ProLuCID search were quantified by in-house software described previously.<sup>S7</sup>

---

*Biol.* **2011**, *7*, 469–478.

<sup>S5</sup> Zuhl, A. M.; Mohr, J. T.; Bachovchin, D. A.; Niessen, S.; Hsu, K. -L.; Berlin, J. M.; Dochnahl, M.; López-Alberca, M. P.; Fu, G. C.; Cravatt, B. F. *J. Am. Chem. Soc.* **2012**, *134*, 5068–5071.

<sup>S6</sup> Link, A. J.; Eng, J.; Schieltz, D. M.; Carmack, E.; Mize, G. J.; Morris, D. R.; Garvik, B. M.; Yates, J. R., III *Nat. Biotechnol.* **1999**, *17*, 676–682.

<sup>S7</sup> Weerapana, E.; Wang, C.; Simon, G. M.; Richter, F.; Khare, S.; Dillon, M. B. D.; Bachovchin, D. A.; Mowen, K.; Baker, D.; Cravatt, B. F. *Nature* **2010**, *468*, 790-795.
